1 **Melanization is an important antifungal defense mechanism in *Galleria mellonella* hosts**

2

3 Daniel F. Q. Smith<sup>1</sup>, Quigly Dragotakes<sup>1</sup>, Madhura Kulkarni<sup>1</sup>, J. Marie Hardwick<sup>1</sup>, Arturo Casadevall\*<sup>1</sup>

4

5 <sup>1</sup> W. Harry Feinstone Department of Molecular Microbiology and Immunology, The Johns Hopkins

6 Bloomberg School of Public Health, Baltimore, MD 21205, United States

7

8 \*Corresponding Author: [acasade1@jh.edu](mailto:acasade1@jh.edu)

9

## 10 **Summary**

11           A key component of insect immunity is melanin encapsulation of microbes. Melanization is also  
12 a part of an immune process known as nodulation, which occurs when insect hemocytes surround  
13 microbes and produce melanin. Insect nodules are analogous to mammalian immune granulomas.  
14 Melanin is believed to kill microbes through the production of toxic intermediates and oxidative  
15 damage. However, it is unclear to what extent immune melanin is directly fungicidal during infections of  
16 insect hosts. We reported previously that *C. neoformans* cells are encapsulated with host-derived  
17 melanin within hemocyte nodules. Here we report an association between melanin-based immune  
18 responses by *Galleria mellonella* wax moth larvae and fungal cell death of *C. neoformans* during  
19 infection. To monitor melanization *in situ*, we applied a tissue-clearing technique to *G. mellonella* larvae,  
20 revealing that nodulation occurs throughout the organism. Further, we developed a protocol for time-  
21 lapse microscopy of extracted hemolymph following exposure to fungal cells, which allowed us to  
22 visualize and quantify the kinetics of the melanin-based immune response. Using this technique, we  
23 found evidence that cryptococcal melanins and laccase enhance immune melanization in hemolymph.  
24 We used these techniques to also study the fungal pathogen *Candida albicans* infections of *G.*  
25 *mellonella*. We find that the yeast form of *C. albicans* was the primary targets of host melanization,  
26 while filamentous structures were melanin-evasive. Approximately 23% of melanin-encapsulated *C.*  
27 *albicans* yeast survive and break through the encapsulation. Overall, our results provide direct evidence  
28 that the melanization reaction functions as a direct antifungal mechanism in insect hosts.

29

30 Keywords: Melanization; nodulation; phenoloxidase; *Galleria mellonella*; fungi; *Cryptococcus*  
31 *neoformans*; *Candida albicans*; tissue clearing; laccase; fungal virulence; timelapse

32

### 33 **Introduction**

34           Insects occupy essential niches in global ecosystems, including many that directly affect human  
35 health and survival <sup>1</sup>. In addition, insects serve as powerful model systems for infectious disease  
36 research, and help to reduce reliance on vertebrates recommended by “3R” - Replace, Reduce, and  
37 Refine – programs <sup>2</sup>. Insects are also targeted by environmental pathogens and have evolved complex  
38 immune mechanisms that partially overlap with mammalian innate immunity. Understanding the  
39 dynamics of insect-pathogen interactions and the factors involved is vital to both ensure ecosystem  
40 stability and establish invertebrate immunological models in research.

41           Fungi are an important class of pathogens for insects, and emerging fungal pathogens are  
42 predicted to become bigger threats to human health and agriculture in the coming years <sup>3,4</sup>.  
43 Consequently, studying host-fungal interactions using insect models is important and timely. Although  
44 insects do not produce antibodies or other mammal-like adaptive immune responses, the antifungal  
45 immune defenses of insects involve cell-mediated and humoral innate immune processes <sup>5</sup>. Hemocytes,  
46 the immune cells of invertebrates which circulate in the hemolymph, have roles comparable to  
47 macrophages and neutrophils in mammals. Hemocytes are responsible for clearance of fungi via  
48 phagocytosis, release of extracellular damaging reactive oxygen species (ROS) and inflammatory  
49 molecules, and the creation of granuloma-like structures through a process called nodulation <sup>6</sup>. During  
50 nodulation, hemocytes surround the microbe and form an aggregate of insect cells, within which,  
51 clotting factors, immune enzymes, and immune complexes are released and activated <sup>6-8</sup>. These  
52 structures immobilize the fungus and lead to its destruction. Also, during infection, the production of  
53 prostaglandins by the plasmatocyte subset of hemocytes in Lepidopteran species cause the lysis of other  
54 hemocytes called oenocytoids. The lysis of oenocytoid cells results in the release of antimicrobial  
55 peptides, signaling molecules, and enzymes important to immune function <sup>9-11</sup>. One class of host  
56 enzymes that are often released and activated during oenocytoid lysis and nodulation are

57 phenoloxidases (PO)<sup>9,11</sup>. POs are enzymes responsible for converting catecholamines in the hemolymph  
58 into melanin<sup>12</sup>. Melanin is a the black-brown pigment that is an important component of insect immune  
59 defense and wound repair<sup>13</sup>. Melanization produces oxidative species and cytotoxic intermediates that  
60 are hypothesized to result in the death of the microbe<sup>12,14</sup>. Additionally, melanin may act as a physical  
61 barrier, restricting gas exchange and nutrient uptake, and thus prevent fungal replication and  
62 dissemination to other tissues<sup>15</sup>. At this time, *in vitro* evidence strongly links PO activity and resulting  
63 melanin intermediates with killing of fungi, bacteria, and viruses<sup>16-18</sup>, but comparable direct evidence  
64 for the microbicidal effect of POs and their toxic intermediates *in vivo* during insect infections is  
65 challenging to measure directly. Consequently, obtaining direct evidence that the process of  
66 melanization is fungicidal *in vivo* is important for establishing insect melanin as an important mechanism  
67 for clearing fungal infections.

68 Larvae of the wax moth *Galleria mellonella* are commonly used as a model organism for  
69 studying fungal pathogenesis<sup>5</sup>. *G. mellonella* larvae are readily available in large numbers at low cost.  
70 Their larger size (2-3 cm) relative to other model insects such as *Drosophila melanogaster* makes them  
71 amenable to research approaches requiring larger volumes of hemolymph, insect hemocytes, and  
72 soluble immune factors. The study of *G. mellonella* hemolymph can prove valuable for understanding  
73 the insect's immune response to infection and stress. *G. mellonella* are also commonly used as a model  
74 for studying mammalian pathogens, including human pathogenic fungi *Cryptococcus neoformans* and  
75 *Candida albicans*<sup>19-21</sup>. While *G. mellonella* is a model for mammalian fungal infections because of  
76 similarities between the *G. mellonella* immune responses and the mammalian innate immune responses  
77<sup>5</sup>, a more thorough understanding of the insect immune response is needed to fully benefit from  
78 studying host-microbe interactions in *G. mellonella*.

79 The differences between mammalian versus insect hosts also provide important new insights  
80 into host-microbe interactions and mechanisms of fungal virulence factors<sup>5,19,20,22,23</sup>. For example,



81 laccase, a fungal enzyme that oxidizes mammalian and insect catecholamines, is an important virulence  
82 factor in both hosts but, seemingly by distinct and diverse mechanisms<sup>19,24,25</sup>. In insects, fungal laccase  
83 appears to oxidize and deplete host catecholamines required for encapsulating the fungus in melanin,  
84 thus weakening the host immune response. Fungal laccases also help detoxify reactive oxygen species  
85 that form during insect immune processes<sup>24</sup>. In contrast, during mammalian infection, fungal laccase  
86 enhances production of fungal melanin to evade key mammalian immune defenses<sup>26</sup>. Thus, fungal  
87 melanins increase virulence in mammals, but decrease virulence in *G. mellonella*<sup>27-29</sup>. These seemingly  
88 different and opposite roles in which fungal melanins interact with mammalian and insect hosts is  
89 unexplored and as of now unexplained in literature.

90 In this study, we describe the first direct evidence that the melanin-based immune response *in*  
91 *vivo* is fungicidal against *C. neoformans*. Our data show a direct link between melanin encapsulation  
92 during infection within the *G. mellonella* larvae and fungal death by visualizing death using an  
93 endogenously expressed GFP-based fungal viability assay. We then used a series of *in situ*, *in vivo*, and *in*  
94 *vitro* methods to study the melanin-based immune response of *G. mellonella* larvae. For *in situ*  
95 experiments, we modified a previously published tissue-clearing protocol to visualize melanized nodules  
96 and their tissue specificity, or lack thereof. We have also developed time-lapse microscopy method for  
97 visualizing the melanin-based immune system. We applied this method to quantify the melanization  
98 kinetics during *in vitro* fungal infection, which improved our understanding of how fungal components,  
99 such as laccase and melanin, interact with insect melanization. We gained insight into how *Candida*  
100 *albicans* activates and evades the melanin-based immune response through morphological switching.  
101 Overall, our findings strongly suggest that melanization has direct antimicrobial activity *in vivo* in the  
102 insect immune system, and we subsequently explore methods to further study the melanization  
103 immune response.

104

105 **Results**

106

107 ***Galleria mellonella* kill *C. neoformans* through melanin encapsulation in nodules**

108           Previously, we found that *C. neoformans* is encapsulated inside immune system-produced  
109 melanins during infection of *G. mellonella*, providing evidence that the melanin-based immune response  
110 is activated against *C. neoformans* in *G. mellonella*<sup>30</sup> (Figure 1A). To evaluate whether insect melanin  
111 encapsulation kills *C. neoformans*, we assessed viability using a GFP-expressing strain of *C. neoformans*,  
112 which expresses GFP under an actin promotor. The GFP-expressing strain as a reporter for fungal  
113 viability *C. neoformans* was validated using the standard dead cell stain propidium iodide. Propidium  
114 iodide staining was nearly mutually exclusive with GFP fluorescence in untreated cells, and GFP  
115 fluorescence was extinguished when heat killed (Figure 1B, Supplementary Figure S1A and S1B). Using  
116 GFP fluorescence as a proxy for cell viability, we found fewer GFP-positive fungal cells in association with  
117 nodules located in the hemolymph compared to non-melanin encapsulated fungal cells at both room  
118 temperature and at 30°C at 24 and 72 h post-infection (Figure 1C and D). Melanin produced by *C.*  
119 *neoformans* in culture did not quench or obscure the GFP fluorescence, as determined by imaging  
120 melanized versus non-melanized *C. neoformans* H99-GFP (Supplementary Figure S1C-D). Hence, this  
121 result suggests that the immune melanization reaction itself is associated with fewer GFP-positive cells,  
122 consistent with death of *C. neoformans in vivo* during infections of *G. mellonella*.

123           Within nodule-encapsulated GFP-positive *C. neoformans*, we measured the degree of immune  
124 melanin intensity and GFP fluorescence intensity. We found that the yeast with the weakest GFP signal  
125 tended to be encapsulated with more melanin surrounding them, compared to the population of  
126 brightly fluorescent cells (Figure 1E). The result was an inverse correlation between melanization and  
127 fluorescence within GFP-positive cells. Most GFP-positive cells had little to no melanization, with a mean

128 gray value around 105, which is the background gray value intensity. The occurrence of faint signal in  
129 some cells suggests that these emanate from cells in the process of dying or having been recently killed.

130 We attempted to use PI as an additional technique to study fungal viability within the nodules  
131 and to show that the GFP-negative cells are indeed dead. Surprisingly, PI staining did not result in the  
132 expected fluorescence in nodule-encapsulated yeast cells, but there was staining in some of the  
133 hemocytes that surrounded the yeast cells, and the external periphery of the nodules (Figure 1F). Given  
134 that PI staining was extracellular to the fungal cell, this staining could reflect released fungal or  
135 hemocyte DNA. The absence of PI staining for fungal cells in nodules suggests that PI was unable to  
136 reach the center of the nodules where the fungi are found and shows that some of the hemocytes  
137 involved in surrounding the fungus may undergo cell death in the process. (Figure 1F). The permeability  
138 or access issues that may arise when using added dyes to measure microbial viability within the nodule  
139 show the usefulness of using a live-dead indicator that is endogenously present within the fungus, such  
140 as the constitutively expressed GFP.

141 To confirm that insect melanin killed *C. neoformans*, we performed complementary experiments  
142 *in vitro* by assessing the ability *G. mellonella* melanization to inhibit the growth of *C. neoformans*. We  
143 incubated *C. neoformans* cells with extracted hemolymph from *G. mellonella* in a 96-well plate. Using  
144 various concentrations of a phenoloxidase-specific competitive inhibitor, phenylthiourea (PTU), we were  
145 able to generate a range of melanin inhibition conditions in the hemolymph-fungal mixture. After 24 h,  
146 we removed a small aliquot of the mixture and plated it on nutrient rich agar to allow fungal growth.  
147 The number of CFUs following a 24 h incubation with the hemocytes and PTU melanin inhibitor was  
148 directly proportional to the concentration of PTU (Figure 1G), and thus inversely proportional to the  
149 degree of melanization (Figure 1G, inset). Melanization, as measured by mean gray value, correlated  
150 with low CFUs (Figure 1H). This result strongly suggests that immune melanization, inhibits the growth  
151 of *C. neoformans in vitro*.

152

### 153 **Time-lapse microscopy of hemocyte-fungal interactions and the melanization response**

154 To record the kinetics of the hemolymph melanization response, we developed a protocol to  
155 extract hemocytes and watch their interactions with fungi (Figure 2A). Using this time-lapse microscopy,  
156 we were able to measure the rate and magnitude of the anti-cryptococcal immune melanization  
157 response following treatment with different species of fungi, mutants, or isolated virulence factors  
158 (Supplementary Video 1-2). Using particle analysis, we could quantify the area covered by melanization  
159 in minute intervals, and we can record the rate of hemolymph melanization (Figure 2B-D). By analyzing  
160 the melanization kinetics between different mutant and wildtype strains, we can determine how the  
161 mutant gene of interest affects fungal interactions with the melanization immune response. We  
162 observed variation in the extent of melanization between different experiments, likely due to variability  
163 in the fungi in the field of view, and biological variability from non-isogenic *G. mellonella* larvae. To  
164 overcome the risk of interpreting variability-derived artifacts as results, each experiment was performed  
165 with a corresponding control (i.e., parental strain and mutant experiments were performed at same  
166 time, using the same stock of hemolymph and the same pool of extracted hemocytes).

167 When we evaluated the rate and magnitude of hemolymph melanization in response to the  
168 *lac1Δ* mutant, we found that there was a dramatically reduced rate and magnitude of hemolymph  
169 melanization compared to the wildtype parental strain (Figure 2E). While the overall magnitude of  
170 melanization varied between replicates, the ratio of insect melanization that occurred in the *lac1Δ*  
171 versus H99 (WT) was statistically significantly lower than 1, and consistently around 0.35 (Figure 2F).

172 Many fungi, including most of those that infect people, produce melanin in their cell walls,  
173 which enables them to persist within mammalian hosts and avoid destruction from oxidative stress and  
174 antimicrobial agents<sup>26</sup>. However, literature shows that melanized fungi are less virulent in *G. mellonella*  
175 compared to their non-melanized or albino mutant counterparts<sup>27,28,31</sup>. We hypothesized that the fungal

176 melanin could act as a pathogen or damage-associated molecular pattern (PAMP/DAMP), resulting in  
177 enhanced activation of the melanization immune reaction. We found that isolated *C. neoformans*  
178 melanin activated immune melanization, both with (Figure 2G) and without hemocytes present  
179 compared to heat killed *C. neoformans* (Supplementary Video 3-5). Since melanin ghosts contain trace  
180 amounts of fungal cell wall components that could theoretically activate the melanization immune  
181 response, we used heat-killed non-melanized cells as a control for the cell wall components that would  
182 be present. This indicates that there is a mechanism by which fungal melanin is specifically recognized  
183 and activates the phenoloxidase cascade. Further, the isolated melanin ghosts are aggregated by the  
184 hemocytes throughout the course of the time-lapse microscopy, even when immune melanization is not  
185 activated (Supplementary video 6).

186 We used this technique to compare the immune melanization between *C. neoformans* and *C.*  
187 *albicans*, the latter of which is known to trigger robust melanization of the hemolymph. In the time-  
188 lapse microscopy, we saw that *C. albicans* activated the melanization response faster (beginning as early  
189 as 15 minutes) and to a significantly greater extent than did *C. neoformans* (Figure 2H). This corresponds  
190 to the levels of melanization previously reported that occurs during *G. mellonella* infection with *C.*  
191 *albicans* versus *C. neoformans* and validates that our system, at least in part, corresponds to what  
192 occurs during actual infection.

193

#### 194 **Evaluating the melanin-based immune response of *G. mellonella* using tissue clearing**

195 Tissue clearing is a technique that allows for visualization of structures deep within an organism  
196 or tissue sample, without significant disruption of the native tissue anatomy. We adapted a previously  
197 reported protocol<sup>32</sup> to visualize the anatomical localization of the anti-cryptococcal melanization  
198 response in *G. mellonella* (Figure 3A,B). We found that using this technique, we could visualize  
199 melanized nodules *in situ* that are formed only during infection with *C. neoformans* and not in

200 uninfected controls (Figure 3C,D). These *in situ* melanized nodules (Figure 3D-F) appeared very similar to  
201 those that are collected from extracted hemolymph, which represent an *in vivo* method of visualizing  
202 the nodules (Figure 1A,3G). The visual similarities between Figure 3E,F and Figure 3G clarified that the  
203 nodules observed in extracted hemolymph are generally representative of the entirety of nodules in the  
204 organism. Both the *in vivo* and *in situ* techniques could be quantified to determine the average  
205 melanized nodule area and degree of melanization (Figure 3H). However, the cleared tissue had some  
206 opacities or normally darker tissues (i.e. digestive tract contents, legs, prolegs, spiracles, cuticle  
207 pigmentation, etc.), which can result in the detection of dark particles even in the uninfected controls,  
208 albeit at a much lower frequency (Figure 3H). Further, while there are some large *C. neoformans* nodules  
209 *in situ* that appeared aggregated together (Figure 3I, arrows), there was no clear anatomical tropism for  
210 nodule formation and the nodules are found throughout the larvae, implying that the infection was  
211 disseminated throughout the body of larvae, possibly through the insect's open circulatory system. The  
212 large, aggregated nodules can be imaged along the Z-axis, which allowed 3D reconstruction of the  
213 nodule for a better understanding of the native nodule structure compared to the *in vivo* preparations  
214 compressed under a slide (Supplementary Video 7). However, compared to the *in vivo* experiments, the  
215 resolution of the melanin-encapsulated *C. neoformans in situ* is limited, and variations in opacity and  
216 tissue thickness could interfere with measurements.

217

### 218 ***Candida albicans* with the Melanin-based Immune Response**

219 *C. albicans* is a fungus known to elicit a strong melanization reaction in hemolymph of infected  
220 *G. mellonella* larvae<sup>33</sup>. We thus employed the *in vitro*, *in vivo*, and *in situ* techniques described above to  
221 gain insight into the host-microbe interactions of *C. albicans* with the *G. mellonella* melanin-based  
222 immune response.

223           Using the *in vivo* technique of extracting infected hemolymph to analyze melanized nodules, we  
224 observed melanin-encapsulated *C. albicans* cells within nodule structures (Figure 4A). These melanized  
225 nodules are like those observed during *G. mellonella*'s infection with *C. neoformans*, however, the  
226 borders of the melanin itself appeared less distinct, blurry, and smudged. An additional difference from  
227 cryptococcal infection was the presence of filamentous *C. albicans* structures within the nodules. These  
228 hyphae or pseudohyphae were melanin-encapsulated, but seemingly to a lesser extent than the yeast  
229 morphology.

230           Analysis of the tissue of larvae infected with *C. albicans* for 24 h using the *in situ* tissue  
231 clarification technique (Figure 4B) revealed groupings of the melanized nodules, often in long string-like  
232 patterns (Figure 4B), that did not appear particularly associated with any organs or tissues (Figure 4C-D,  
233 supplemental Figure 2A-F). Under higher magnification, we observed lightly pigmented hyphae and dark  
234 spherical melanized particles within the cleared larvae after 24 h of infection (Figure 4C-F). These images  
235 validate that filamentation occurred within *G. mellonella*, which was previously observed with histology.  
236 The melanin-encapsulated fungi form large aggregates (Figure 4C,D), which we initially thought could be  
237 indicative of a tropism for a specific tissue such as the chitinous trachea. However, upon dissection of  
238 uncleared infected larvae, there did not appear to be an association of these clusters with any specific  
239 tissues (Supplementary Figure 2 A-F). Differences in pigmentation between the two *C. albicans*  
240 morphologies, particularly as seen in the Z-projection in (Figure 4F), indicated that the hyphae were  
241 encapsulated with less melanin during infection compared with the yeast form of the fungus. One  
242 potential bias in interpreting this data is that since we are only looking at melanin pigmentation, we are  
243 likely missing any non-melanin encapsulated fungi which would blend in with the insect tissue.

244           We used the *in vitro* time-lapse microscopy to observe the melanization dynamics of *C. albicans*  
245 in hemolymph. As seen earlier (Figure 2H), *C. albicans* triggered a more robust melanization response  
246 than *C. neoformans* (Figure 5A). In time-lapse microscopy performed without the addition of insect

247 hemocytes, we observed that the *C. albicans* began to grow in filamentous forms (Figure 5B2),  
248 consistent with the importance of filamentation in the pathogenesis of *C. albicans* within *G. mellonella*  
249 and the *in situ* data (Figure 3)<sup>23</sup>. In mammalian hosts, filamentation is triggered by serum, neutral pH,  
250 and temperature<sup>34,35</sup>. However, in the *G. mellonella* system, filamentation *in vitro* does not occur when  
251 the *C. albicans* is only incubated with hemocytes without hemolymph, indicating that a component of  
252 the hemolymph is necessary for the morphological switch. Interestingly, as the time-lapse movie  
253 progressed, we observed that the hyphae did not get encapsulated by melanin in comparison to the  
254 yeast form of *C. albicans* (Figure 5B2). In mammalian hosts, filamentation by *C. albicans* is used to evade  
255 immune detection in part due to changes in cell wall structure and expression that prevent binding of C-  
256 type Lectins. After about 12 hours of filamentous growth, we observed the formation of blastoconidium  
257 (yeast) along the hyphae (Figure 5B3). The formation of these yeast cells then corresponded with a  
258 subsequent “bloom” of melanization (Figure 5A, B4, Supplementary Video 8). A similar temporal  
259 progression of *C. albicans* morphology and melanin-encapsulation is seen in *C. albicans* infected larvae  
260 dissected at various timepoints post-infection (Supplementary Figure 2G). The average time of this  
261 melanin bloom was about 840 minutes, with a 95% confidence interval between approximately 720  
262 minutes and 960 minutes (Figure 5C).

263 We observed that some of the melanin-encapsulated yeast survived the immune reaction and  
264 then underwent hyphal and/or pseudohyphal growth (Figure 5D, Supplementary Video 9). This occurred  
265 in about 23% of melanin-encapsulated yeast, with 8% of single yeast and 38% of budded/pairs of yeast  
266 being able to escape (Figure 5E) The time until hyphal or pseudohyphal growth was significantly delayed  
267 in the melanin-encapsulated cells; the median time for a non-melanin encapsulated *C. albicans* cells to  
268 begin filamentation is 97 minutes, while the melanin-encapsulated counterparts take 230 minutes, with  
269 some taking as long as 520 minutes (Figure 5F). This delay could be reflective of physical barriers as the



270 fungus breaks through the melanin layer and/or delays in initiating cellular growth because of cell  
271 damage caused by the immune response.

272           Altogether, these data demonstrate three phases of the *C. albicans*-immune melanization  
273 interactions: 1) yeast become encapsulated with melanin, with nearly 25% surviving and breaking  
274 through the pigment, 2) cells undergo a yeast-to-hyphal transition, with the hyphal and pseudohyphal  
275 cells evading the melanization immune response; and 3) filamentous *C. albicans* begins to produce more  
276 yeast cells (referred to as blastoconidia or blastospores), which then causes a second bloom of  
277 melanization to occur (Summarized in Figure 6). While host melanization and fungal filamentation have  
278 been well-reported during the course of *C. albicans* infection<sup>23,36-39</sup>, this is the first indication that the  
279 hyphae and pseudohyphae are melanin-evasive. Although the presence of blastoconidia has been  
280 reported in *G. mellonella* infected with *C. albicans*<sup>36</sup>, these data indicate for the first time that lateral  
281 blastoconidia growing from hyphae induce a strong “second wave” melanization response.

282

## 283 **Discussion**

284           Melanin has been appreciated as a key part of the insect immune defense against microbes and  
285 parasites for the greater part of the past century<sup>13,40</sup>. Immune melanization has been implicated as a  
286 major process in neutralizing entomopathogenic fungi upon infection<sup>41</sup>. The insect phenoloxidase and  
287 the melanization cascade produce toxic intermediates such as dihydroxyindole (DHI) and high levels of  
288 oxidative stress that can overwhelm and kill the fungus or microbe *in vitro*<sup>13,17</sup>. However, there have  
289 been no *in vivo* studies showing that melanization directly kills fungi during these immune reactions  
290 within the insect. In this paper, we fill that gap by showing that melanization within nodules is  
291 associated with the death of *C. neoformans* using a GFP viability reporter assay and provide additional *in*  
292 *vitro* data for a fungicidal role in immune defense.

293           During cryptococcal infection of *G. mellonella*, melanin encapsulation of the fungus melanin  
294 encapsulation within nodules was associated with diminished or lost fluorescence signal in these GFP-  
295 expressing *C. neoformans* strains. Additionally, the melanin-encapsulated fungi that remained GFP  
296 positive had weaker signals and the intensity of the GFP signal was more intense for the non-melanin  
297 encapsulated fungi within the nodules. The expression of GFP in these cells is under the control of an  
298 actin promotor, and while actin is generally presumed to be constitutively expressed in cells, growth  
299 conditions have been shown to lead to some alterations in cryptococcal actin expression<sup>42,43</sup>. If the  
300 environmental conditions within the nodule abolished actin expression in some cells without killing the  
301 fungus, we would expect that condition to equally affect the melanin and non-melanin encapsulated  
302 fungi, and as a result, see similar GFP-negative: GFP-positive ratios between the melanin-encapsulated  
303 and not melanin-encapsulated cells. The association between melanin encapsulation and disappearance  
304 in GFP fluorescence provides strong evidence for the notion that the melanization reaction kills fungal  
305 cells during infection. This is the first evidence that *G. mellonella* immune melanization directly and  
306 effectively neutralizes *C. neoformans* during infection and the first demonstration that melanin  
307 encapsulation results in fungal death within the insect. Previously, the death of microbes, specifically  
308 bacteria, was attributed to the enzymatic activity of the melanin-producing phenoloxidase (PO) in an *in*  
309 *vitro* reaction<sup>16</sup>. In addition to our association of melanin encapsulation and fungal death *in vivo*, we  
310 sought to reproduce these results *in vitro* using extracted hemolymph in buffer. We used the PO-specific  
311 inhibitor, phenylthiourea (PTU), to inhibit PO activity and melanization and found that PO-inhibited wells  
312 of hemolymph had higher recoverable CFUs of *C. neoformans* compared. The inverse correlation of  
313 melanization with CFUs further supports the claim that melanin plays a role in neutralizing *C.*  
314 *neoformans*. Since we only assayed CFUs from these *in vitro* experiments, we cannot determine whether  
315 the melanization in the *in vitro* experiments directly killed the fungus or just inhibited fungal growth.

316 In addition to studying the extracted hemolymph, we used a developed *in vitro* time-lapse  
317 microscopy assay. We investigated the impact of fungal melanins on the insect immune response. We  
318 found that isolated fungal melanins, termed “melanin ghosts,” activated the melanin-based immune  
319 response whereas the heat-killed *C. neoformans* did not. This suggests that fungal melanins can activate  
320 the immune system which could help promote fungal clearance. This is interesting in the context of  
321 naturally-occurring fungal pathogens of insects, which tend to have a white color and/or do not  
322 naturally produce melanin pigment, such as *Beauveria bassiana* and *Metarhizium anisophilae*<sup>24,25</sup>. This  
323 may be because of evolutionary pressure that selects for entomopathogenic fungi that produce less  
324 fungal melanin and thus are better at evading the insect’s melanin-based immune response. Since  
325 melanin is a component of the insect wound response, it is possible that these exogenous melanins are  
326 recognized by the insect as a damage associated molecular pattern (DAMP) and launches an  
327 inappropriate wound repair response.

328 We found that the *lac1Δ* mutant, which is unable to produce the enzyme laccase, causes less  
329 melanization in the hemolymph. This implies that some of the trigger for melanization comes from  
330 laccase-catalyzed initiation of melanin formation using host-derived catecholamines in the hemolymph.  
331 This is consistent with the observation that for *B. bassiana* infection of *G. mellonella*, that laccases play a  
332 role in virulence by oxidizing the hemolymph catecholamines and preventing them from producing anti-  
333 fungal melanization and reducing the oxidative burden on the fungus<sup>24</sup>. It is also worth noting that the  
334 *lac1Δ* mutant is less virulent in *G. mellonella* infections compared to the parental<sup>19</sup>. Together, these  
335 observations paint a nuanced picture of the role that laccase and fungal melanin play during fungal  
336 pathogenesis in *G. mellonella* – both fungal melanin and fungal laccases activate the melanin-based  
337 immune response, while fungal melanins are associated with decreased virulence, fungal laccases  
338 enhance virulence. We note that laccase is secreted by *C. neoformans* and is found in extracellular  
339 vesicles, which could transport laccase away from the fungal cell and reduce the antifungal damage

340 from its effects on triggering insect immune melanization. We were also able to compare the amount of  
341 melanization that *C. neoformans* triggers with the amount triggered by other fungal species such as *C.*  
342 *albicans*. The differences in hemolymph-induced melanization during exposure to *C. albicans* and *C.*  
343 *neoformans* were previously described<sup>33</sup>, and our results confirm those findings.

344         The second method used to evaluate the melanization response to *C. neoformans* was tissue  
345 clarification, which enabled us to visualize melanized nodules *in situ* deep within the larvae. We  
346 modified a recently developed protocol<sup>32</sup> to view the nodules that formed during infections, and saw  
347 the native structures of the nodules and their anatomical location in the larvae. This offers an advantage  
348 over dissection of uncleared larvae, because during the dissection process: 1) the tissue organization is  
349 disrupted, 2) some organs such as the nerve cord and cardiac system might be disrupted, and 3) the  
350 geography of infection patterns may not be apparent. Additionally, melanized nodules may not be  
351 visible within or behind opaque tissues and organs. Tissue dissection of opaque larvae was helpful when  
352 evaluating tissue tropism since tissue boundaries may not be fully visible in clarified larvae. A bias  
353 involved in studying fungal infections using both tissue clearing and dissection is that the non-melanized  
354 nodules or fungi may be missed, as unpigmented fungi will likely blend in with surrounding tissue.  
355 However, in the clearing method, we viewed the nodules throughout the entire depth of the larvae at a  
356 low to moderate (4x to 40x) magnification using light microscopy. However, the objective and  
357 microscope limitations only permitted imaging the superficial melanized nodules at 100x magnification,  
358 which provided a lower resolution of the nodules compared to the imaging of the extracted hemolymph.  
359 While in the case of *C. neoformans*, the nodules within the hemolymph appeared congruent to those  
360 viewed *in situ*, that might not always be the case. Nodules in extracted hemolymph during other fungal  
361 infection may not be entirely representative of those found throughout the entire larvae, so only  
362 viewing the hemolymph nodules may give a biased understanding of the fungal infection.

363 We also examined the melanization response to *Candida albicans* infection. *C. albicans* is known  
364 to trigger large scale systemic melanization in *G. mellonella* larvae<sup>33,44</sup>. Similar to *C. neoformans*, we  
365 found melanized nodules in the hemolymph from larvae infected with *C. albicans*. Interestingly, the  
366 center of these nodules had melanized and smoothed areas that seemed more amorphous than those  
367 seen with *C. neoformans*, and additionally, we saw hyphal structures appeared less melanized than the  
368 spherical yeast-like structures. Using the tissue clarification method, we noted that the melanin-  
369 encapsulated *C. albicans* formed large rope-like aggregates without tissue tropism, with yeast being  
370 preferentially melanized over hyphal cells. Using *in vitro* time-lapse microscopy, we found that rapid  
371 melanization occurred, even in the absence of hemocytes. Additionally, after the melanization plateaus,  
372 the surviving fungus can break free from the melanin encapsulation and undergo melanin-evasive  
373 filamentation. This is followed by production of laterally-budding blastoconidium and a bloom in  
374 melanization around these newly formed yeast cells. Similar fungal morphologies and timelines were  
375 observed in dissected infected larvae, although the temporal kinetics were less resolved and  
376 identification of blastoconidium was less clear. Together, these data paint an interesting picture and  
377 allow insight into the pathogenesis of *C. albicans* within *G. mellonella* host. Hence, it appears that the  
378 melanin encapsulation can clear most of the yeast upon infection, however, cells that survive can then  
379 filament and evade subsequent melanin-mediated killing. The hyphae are known to penetrate and infect  
380 organs within the insect<sup>23</sup>. The hyphae then produce yeast, which again triggers a burst of melanization  
381 that would likely cause damage to the surrounding tissue and eventually death of the organism.

382 In summary, we found evidence that the *G. mellonella* wax moth directly kills *C. neoformans* by  
383 encapsulating it with melanin *in vivo* using a GFP-expressing strains where fluorescence indicates  
384 viability. This association between melanin encapsulation and reduced viability provides the first direct  
385 evidence for fungal killing via melanin encapsulation *in vivo*. We also describe three different  
386 methodological approaches for studying the melanization response to fungi in *G. mellonella* and employ

387 these techniques to study *C. neoformans* and *C. albicans* interactions with the melanin-based immune  
388 response. With *C. neoformans*, we show that both fungal melanins and fungal laccases can activate the  
389 insect's melanization immune response, furthering our understanding of how these fungal components  
390 interact with insect immunity and alter the fungus' pathogenesis. In *C. albicans*, we are able to observe  
391 how some melanin-encapsulated yeast are able to break through the melanization, and form melanin-  
392 evasive hyphae and pseudohyphae during infection. The direct association of insect melanization with  
393 antifungal defense further heighten concern that pesticides that inhibit the melanin reaction<sup>30</sup> could  
394 have untoward and unpredictable effects on insect populations.

395

#### 396 **Acknowledgements**

397 We would like to thank the entire Casadevall Lab for their contributions during lab meetings and other  
398 discussions of this project. We would like to thank Maryann Smith, Thomas Hitzelberger, and Kathy  
399 Spinnato for placing the years of weekly *G. mellonella* orders. Figure 6 was created using Biorender.com.  
400 D.F.Q.S., Q.D., and A.C. are funded by National Institute of Allergy and Infection Disease R01 AI052733.  
401 D.F.Q.S. is funded by National Institutes of Health 5T32GM008752-18 and 1T32AI138953-01A1. The  
402 funders had no role in study design, data collection and analysis, decision to publish, or preparation of  
403 the manuscript. The salaries of D.F.Q.S., Q.D., and A.C. are in part funded by the National Institute of  
404 Allergy and Infection Disease. The salaries of D.F.Q.S. and Q.D., are in part funded by the National  
405 Institutes of Health.

406

#### 407 **Author contributions**

408 Conceptualization – DFQS, QD, MK, JMH, AC; Methodology – DFQS, AC, QD, MK; Software – QD;  
409 Validation – DFQS; Formal analysis – DFQS, MK; Investigation – DFQS, MK; Resources – AC, JMH; Data  
410 curation – DFQS; Writing (Original Draft) – DFQS, AC; Writing (Review and Editing) – DFQS, QD, MK, JMH,

411 AC; Visualization – DFQS, MK; Supervision – DFQS, JMH, AC; Project Administration – DFQS, AC; Funding  
412 Acquisition – JMH, AC

413

414 **Declaration of Interests**

415 Authors have no interests to declare

416

417 **Figure Legends:**

418

419 **Figure 1. *The melanin-based immune response is implicated in killing C. neoformans during infection.***

420 (A) During infection of *G. mellonella*, melanized nodules are formed within the hemolymph, which  
421 encapsulate the fungus. Red arrows indicate melanin-encapsulated fungus, while white arrows show the  
422 hemocytes surrounding the fungi. (B) GFP fluorescence is lost in heat killed *C. neoformans* cells  
423 expressing GFP under an actin promoter. (C) Using a GFP-expressing strain of *C. neoformans*, we can  
424 visualize cell viability within the nodule, with living fungi fluorescing green and dead cells having no  
425 signal. (D) Melanin-encapsulated fungi are statistically less likely to have a GFP-positive signal at 24 h  
426 after infection at 30°C, and at 72 h post infection at room temperature and 30°C ( $p < 0.00001$ ,  $p = 0.00004$ ,  
427 and  $p = 0.0001$ , respectively, Chi-squared test), indicating that melanin-encapsulation is associated with  
428 fungal death. (E) In GFP-positive cells, the brighter fluorescence signal correlates with little to no  
429 melanization, with no cells that have strong GFP signals and large amounts of melanin encapsulation.  
430 Each point represents data from one GFP-positive fungus within a nodules from three biological  
431 replicates. (F) Propidium Iodide viability staining does not appear to penetrate the inner space of the  
432 nodule where the fungus is located, but the staining does show that the hemocytes surrounding the  
433 fungus are not viable. (G) Colony forming units (CFUs) correlate directly to melanin inhibition using PTU  
434 (inset) in vitro, which indicates that melanin has a role in controlling growth of *C. neoformans*. Each data

435 point represents the mean and 95% Confidence Interval of three independent biological replicates. (H)  
436 CFUs also inversely correlated to the Mean Gray Value of these wells, meaning that the darker wells  
437 with more melanization had higher CFUs recovered compared to the melanin-inhibited wells. Each data  
438 point indicates measurements from individual wells across three biological replicates. (A-C,F) Data  
439 shown is representative of three biological replicates. All experiments performed in biological triplicate,  
440 with (G) representing 5 biological replicates. Scale bars represent 10  $\mu\text{m}$ .

441 **Figure 2. Using in vitro timelapse microscopy to visualize the melanin-based immune response.** (A)  
442 Using a developed timelapse microscopy protocol, we were able to record the dynamics of hemolymph  
443 melanization in response to *C. neoformans* from 0 (B) up to 24 hours (C). We can then use particle  
444 measurement software to visualize and quantify the melanization reactions over time (D). This method  
445 can be used to gain novel insight into how different virulence factors, such as laccase, influence the  
446 melanization response, where we see that the laccase knockout mutant causes less of a melanization  
447 response without much change in time until onset of melanization (E). Overall, the *lac1Δ* triggers ~40%  
448 as much of a melanization immune response compared to the WT (F). (G) Isolated fungal melanins are  
449 associated with activation of the insect melanin based immune response, whereas the heat killed  
450 cryptococcal cells are not (H) Additionally, we can compare the activation of the melanin-based immune  
451 response from different fungal species such as *C. neoformans* and *C. albicans*, which strongly activates  
452 the melanization immune response. (B-D, G) are representative images and graphs from three biological  
453 replicates. (E,F,H) represent averages from biological replicates. Error bars indicate Standard Deviation.  
454 Scale bars represent 50  $\mu\text{m}$ .

455 **Figure 3 Using tissue clearing to visualize the melanin-based immune response against *C. neoformans***  
456 **in situ.** Using tissue clearing techniques (A), we allowed for better visualization of melanized nodules  
457 within the intact *G. mellonella*, as seen in a before (top) and after (bottom) view of the same infected



458 larvae (B). Under microscopy, the uninfected larvae have little to no melanized nodules (red arrows  
459 indicate dark, irregular, or opaque areas in the tissue) (C), whereas the *C. neoformans* larvae have very  
460 clear and distinct nodules (D). These nodules can be viewed under high magnification, where the nodule  
461 structure and encapsulated fungus is apparent (E-F). These structures are very similar in appearance to  
462 the nodules extracted from hemolymph (G). The size of the melanized nodules can be quantified using  
463 particle measuring software. Infected particles represents  $n = 771$ , uninfected particles represent  $n$   
464  $=104$ ,  $p = 0.016$  (Mann-Whitney test) (H). (I) The melanized nodules of *C. neoformans* appear to have no  
465 particular tissue tropism, but can be found in distinct clumps or areas throughout the larvae (red  
466 arrows). (B-G, I) are representative images from three biological replicates. Scale bars in (E-G, I)  
467 represent  $10\ \mu\text{m}$ , and in (C,D) represent  $500\ \mu\text{m}$ .

468 **Figure 4. Visualizing the melanization response to infection with *Candida albicans*.** (A) Similar to the  
469 hemolymph from larvae infected with *C. neoformans*, we are able to see melanized nodules within the  
470 hemolymph. The melanized spot within these nodules appears more diffuse/less defined, and in some,  
471 the presence of less-melanized hyphae is distinct (red arrows). (B) We can also use tissue clearing to  
472 visualize the melanized nodules during *C. albicans* infection. (C-D) The melanized *C. albicans* seem to  
473 cluster in specific areas, in long strips within the larvae. (E-F) Under higher magnification, we can see  
474 hyphal structures of *C. albicans*, which corresponds to what is previously known about *C. albicans*  
475 morphology in *G. mellonella*. Interestingly, the hyphae appear less melanized (red arrows) compared to  
476 the spherical yeast (white arrows) (F). All panels show representative images from 3 biological  
477 replicates. Error bars in (A,D-F) represent  $10\ \mu\text{m}$  and in (C) represent  $500\ \mu\text{m}$ .

478 **Figure 5. Using timelapse microscopy to gain insight into *C. albicans* yeast and hyphae interactions**  
479 **with the melanization immune response.** (A) Kinetics of the melanization reaction within hemolymph  
480 incubated with *C. albicans* yeast, with a distinct tri-phasic response in which there is an initial peak

481 reaction, an extended plateau, and a greater second peak of the melanization reaction. (B) Using  
482 microscopy, we can see that the yeast start off non-melanized (B1), and most reach their peak melanin-  
483 encapsulation by 120 minutes (B2). After which, the yeast begin to filament, and hyphae grow between  
484 120 min and 750 minutes with minimal melanin encapsulation occurring. At 750 minutes (B3),  
485 blastoconidium (yeast) begin to form on the hyphae, which then corresponds to a rapid increase in  
486 melanization (B4). (C) The time until this melanin bloom is approximately 14 hours. Through these  
487 movies, we also see that some melanin-encapsulated yeast are able to survive the immune response  
488 and grow from underneath the layer of pigment (D). The melanin-encapsulated *C. albicans* in panel (D)  
489 begins to grow through the melanin by 250 minutes. (E) Overall, approximately 23% of melanin-  
490 encapsulated yeast are able to grow following melanin-encapsulation, with pairs of melanin-  
491 encapsulated yeast having the highest percentage of growing, with a 33% occurrence. (F) In the yeast  
492 that are able to grow following melanin-encapsulation, the time until germ tube formation is delayed to  
493 on average 230 minutes (n = 26), while in non-encapsulated yeast, the average time is 90 minutes (n =  
494 111). Statistical test represented in (E) is an unpaired t-test, and error bars indicate Median with 95%  
495 Confidence Interval. (A,B,D) show representative data from three biological replicates. Each data point  
496 in (C) represents an independent replicate. (E,F) show data from 4 biological replicates. Error bars  
497 indicate 100  $\mu$ m.

498 **Figure 6. Overview of the growth of *C. albicans* within *G. mellonella* and the fungus' interaction with**  
499 **the melanization immune response.**

500 **Supplementary Figure 1. Fungal melanization does not affect GFP signal in the H99-GFP strain. (A-B)**

501 GFP signal is lost upon heat treatment for 1 hour, and cells become exclusively propidium iodine positive  
502 Insets in (A) indicate representative images of cells in untreated condition, with arrows pointing to a PI-  
503 only positive cell and a PI and GFP double positive cell. Non-melanized H99-GFP (C) and melanized H99-

504 GFP (D) have comparable levels of GFP-fluorescence. Insets in (D) indicate representative selections of  
505 melanized cells that have GFP signal.

506 **Supplementary Figure 2. Dissection of *C. albicans* infected *G. mellonella*.** There does not appear to be  
507 any specific tissue tropism for *C. albicans* infections in *G. mellonella*, with visible melanized nodules  
508 found in scattered in the Fat Bodies (A-C red arrow), trachea (A,C,D white arrow), and the gut (E,F).  
509 Microscopic analysis of the dissected tissue also reveals hyphal structures with reduced pigmentation  
510 compared to the yeast-like structures (B). (G) A similar progression of *C. albicans* morphological  
511 progression is seen in dissected tissues infections as is seen during the *in vitro* microscopy. At 0 minutes,  
512 there is no melanin encapsulation of the *C. albicans* yeast, whereas after 1 h, there is extensive  
513 melanization of *C. albicans* yeast. At 12 h, non-melanized hyphal and pseudohyphal structures are visible  
514 along with melanized yeast and potential laterally budding blastoconidium. By 17 h, there appears to be  
515 melanized laterally-budded blastoconidium with non-melanized hyphae, similar to what we see  
516 between hour 12 and 16 in the timelapse microscopy. Red arrows in (G) indicate yeast, yellow arrows  
517 indicate pseudohyphae, green arrows indicate hyphae, and blue arrows indicate potential laterally-  
518 budded blastoconidium.

519

520 **Supplementary Figure 3. In vitro timelapse microscopy protocol.** First, hemolymph from surface  
521 sterilized larvae are collected into anticoagulation buffer, hemocytes are centrifuged, washed in  
522 anticoagulant, and resuspended in insect physiological saline, and left to settle on a MatTek dish for 10  
523 minutes. Simultaneously, hemolymph was collected into insect physiological saline, filtered with a PVDF  
524 0.22  $\mu\text{m}$  filter. Antibiotic and fungus is then added, left to sit for 10 minutes, and added to the adherent  
525 hemocytes following 4 washes with insect physiological saline. Timelapse microscopy was then  
526 performed for up to 24 hours.

527

528 **Materials and Methods**

529

530 **Biological materials**

531 *G. mellonella* last-instar larvae were obtained through Vanderhorst Wholesale, St. Marys, Ohio,  
532 USA. *C. neoformans* strain H99 (serotype A), *C. neoformans* strain H99-GFP<sup>45</sup>, *C. neoformans lac1Δ*  
533 mutant, and *Candida albicans* strain 90028 were kept frozen in 20% glycerol stocks and sub-cultured  
534 into yeast peptone dextrose (YPD) broth for 48 h at 30°C prior to each experiment. For H99-GFP  
535 infections, frozen stock was streaked out first onto YPD agar, and green colonies were inoculated into  
536 YPD broth for 48 h at 30°C prior to each experiment. The yeast cells were washed twice with PBS,  
537 counted using a hemocytometer (Corning, New York, USA), and adjusted to 10<sup>7</sup> cells/ml for an injection  
538 inoculum of 1 x 10<sup>5</sup> cells/larva. *C. albicans* infections were performed at 5 x 10<sup>5</sup> cells/larva.

539

540 **Extraction of hemolymph from fungal-infected *Galleria mellonella* larvae**

541 Infection of *G. mellonella* larvae was performed as previously described<sup>30</sup>. Briefly, washed *C.*  
542 *neoformans* or *C. albicans* cultures, resuspended to 10<sup>7</sup> cells/ml were injected in the right rear proleg of  
543 larvae ranging from 175 to 225 mg. Infected larvae were then incubated at 30°C. Three days following  
544 infection, larvae were removed from incubator, and hemolymph was extracted by puncturing the right  
545 rear proleg with an 18 G needle. Removed hemolymph from 3 larvae was collected directly into 1 ml  
546 anticoagulation buffer at room temperature<sup>46</sup>. Hemolymph was centrifuged for 5 minutes at 4,000 x *g*  
547 and resuspended in 200 µl insect physiological saline (IPS) (150 mM sodium chloride, 5 mM potassium  
548 chloride, 7.21 mM calcium chloride, 1 mM sodium bicarbonate, pH 6.90 – adapted from<sup>47–49</sup>). Samples  
549 were placed on slides and nodules were imaged using Olympus AX70 microscope with a 100x oil  
550 immersion objective.

551 ***C. neoformans* GFP Viability Assay**

552 H99-GFP strain was streaked from frozen stock on YPD agar and incubated at 30°C. 2 ml YPD was  
553 inoculated with H99-GFP and incubated for ~18 h at 30°C with rotation. Culture was diluted to OD 0.5  
554 and 100 µL was incubated at 70°C for 1 h using a thermocycler. 100 µL of untreated and heated samples  
555 were stained with 10 µg/ml propidium iodide (Invitrogen). 10 µL of stained samples were loaded onto a  
556 hemocytometer and imaged using a 10X objective and Zeiss AxioImager M2 (60x Olympus objective)  
557 equipped with a Hamamatsu Orca R2 camera and Volocity Software (Perkin Elmer). Images were  
558 analyzed using ImageJ/FIJI software. Fluorescence channel images were processed by adjusting the  
559 minimum pixel value to 10 and maximum to 90. Number of fluorescent cells for each channel were  
560 counted using Measure Particles. Number of double fluorescence positive and double fluorescence  
561 negative cells were enumerated manually.

562

563 ***C. neoformans* GFP Fungal Survival Assay *in vivo***

564 *G. mellonella* larvae were infected as previously described using H99-GFP. Larvae were incubated for 3  
565 days at 30°C, and hemolymph was extracted. Melanized nodules were visualized using an Olympus AX70  
566 microscope with 488 excitation/520 nm emission fluorescence microscopy to visualize the GFP signal.  
567 Images were taken at 100x magnification with the same exposure, and manually marked as positive or  
568 negative for GFP fluorescence, and melanin-encapsulated or unencapsulated. For fluorescence and  
569 melanin intensity measurements, images were analyzed using the Measure tool in FIJI<sup>50</sup>, and the 8-bit  
570 mean gray value of each cell was measured in both channels. The region selected for the melanin  
571 measurements extended the edge of the fungal capsule, and the GFP intensity measurements were  
572 from selections limited to the fluorescent cell's body.

573

574 **Phenoloxidase Inhibition and Fungal Survival Assay *in vitro***

575 Serial dilutions of phenylthiourea (PTU) were performed in 100  $\mu$ l IPS buffer, to which 5  $\mu$ l of  $10^6$  cells of  
576 *C. neoformans* was added. *G. mellonella* hemolymph was extracted as previously described into insect  
577 physiological saline, and 100  $\mu$ l of the mixture was added to each well. The mixture was incubated at  
578 room temperature for 24 hours protected from light. Following the incubation, the contents of each well  
579 were resuspended and diluted 1:16 in PBS. From the dilution, 5  $\mu$ l was spotted on a Sabouroud agar  
580 plate. The plate was incubated at 30°C for 24 h and colonies were enumerated under a dissection  
581 microscope.

582

### 583 **Tissue Clearing of *Galleria mellonella* following fungal infection**

584 *G. mellonella* larvae were infected with *C. neoformans* or *C. albicans* as described above. Five days  
585 following infection, groups of three larvae were removed from incubator and injected with 10  $\mu$ l of 1 M  
586 ascorbic acid to inhibit new melanization and oxidation of endogenous catecholamines during the tissue  
587 clearing process. Ten minutes following the ascorbic acid injection, larvae were placed at -20°C for  
588 fifteen minutes to euthanize them, then injected with an additional 10  $\mu$ l of 1 M ascorbic acid. Larvae  
589 were immediately placed in 40 mL of 4% paraformaldehyde. Larvae were fixed, permeabilized, and  
590 cleared in Benzyl Alcohol and Benzyl Benzoate (BABB) solution as previously described<sup>32</sup>. Following 5 to  
591 7 days of tissue clearing, larvae were removed from the BABB solution and pressed between two glass  
592 microscope slides. Once flattened, a coverslip was placed on top of the larvae and parafilm into place.  
593 Larvae were imaged using Olympus AX70 microscope with 4x, 20x, and 100x objectives.

594

### 595 **Imaging *Galleria mellonella* hemocytes *in vitro***

596 To collect and isolate hemocytes *G. mellonella* larvae were surface sterilized in two sequential baths of  
597 70% ethanol, followed by 10% bleach, then dried on sterile paper towels. Five to 10 drops of  
598 hemolymph were extracted as described above into room temperature anticoagulation buffer and

599 inverted 3 times. Hemolymph was centrifuged at 400 x *g* for 4 minutes, the supernatant was removed,  
600 and the hemocytes were resuspended in 1 ml anticoagulation buffer and centrifuged. The supernatant  
601 was completely removed and hemocytes were resuspended in 200  $\mu$ l of insect physiological saline (IPS).  
602 The 200  $\mu$ l suspension of hemocytes were added to the coverslip of a MatTek dish and allowed to settle  
603 for 10 minutes. Following the 10 minutes, the buffer and unsettled hemocytes were removed, and the  
604 coverslip was washed 4 times with 1 ml of IPS. The hemocytes are seeded into the coverslip at a cell  
605 density of  $1.5 \times 10^6$  cells/ml and the resulting hemocyte density after washing is approximately  $2-3 \times 10^3$   
606 cells/mm<sup>2</sup>.

607

608 While the hemocytes were being isolated, cell-free hemolymph was being prepared. Approximately 10  
609 drops of hemolymph were removed from *G. mellonella* larvae and collected directly into 1 ml IPS. To  
610 remove hemocytes, the mixture was filtered using a 0.22  $\mu$ m syringe-driven PVDF filter. Cell-free  
611 hemolymph was stored up to a week at -80C. Penicillin-Streptomycin (Gibco, Thermo Fisher) antibiotic  
612 was added at 1x concentration to the cell-free hemolymph. For experiments looking at the interaction of  
613 hemocytes with fungi or a virulence factor, the cells or component are added at this stage.

614

615 Following the hemocyte washes, 1 ml of cell-free hemolymph was added to the entirety of the MatTek  
616 dish, followed by an addition 1 ml of IPS. The MatTek dish was covered and imaged using the  
617 OpenFlexure microscope and software and time-lapse microscopy was performed every minute for 16-  
618 24 hours<sup>51</sup>. This protocol is summarized in Supplementary Figure 3.

619

620 All timelapse data was analyzing using FIJI<sup>50</sup> and particle measurements were made by converting the  
621 image sequence to 8-bit, setting a threshold of 0-50 gray value, and analyzing any particle over the size

622 of 4 pixels<sup>2</sup>. Measuring the time until germ tube formation was done manually by recording the frame in  
623 which the first of the germ tube was visible.

624

### 625 **Melanin Ghost Isolation**

626 *C. neoformans* cultures were grown in minimal media with 1 mM L-DOPA for 7 days at 30°C. Cells were  
627 collected and mixed 1:1 with 12 N hydrochloric acid (HCl), for a final concentration of 6 N HCl. Cells were  
628 heated for 1 hour at 85°C under constant shaking at 350 RPM. Control cells were heat killed cells were  
629 incubated for 1 hour at 85°C in PBS. Cells were washed twice in PBS and subsequently used in the time-  
630 lapse microscopy.

631

### 632 **Multimedia Files:**

633 Supplementary Video 1\_ *C. neoformans* timelapse

634 Supplementary Video 2\_ *C. neoformans* timelapse

635 Supplementary Video 3\_ Melanin Ghost vs heat killed

636 Supplementary Video 4\_ Melanin ghost without hemocytes

637 Supplementary Video 5\_ Melanin ghost timelapse

638 Supplementary Video 6\_ Hemocyte-ghost interactions

639 Supplementary Video 7\_ In situ nodule projection

640 Supplementary Video 8\_ Melanin Bloom Candida

641 Supplementary Video 9\_ *Candida albicans* escape

642 Supplementary Video 10\_ *C. neoformans* Anticoagulation Buffer

643 Supplementary Video 11\_ No fungus timelapse

644



645 **References:**

- 646 1. Vector-borne diseases [https://www.who.int/news-room/fact-sheets/detail/vector-borne-](https://www.who.int/news-room/fact-sheets/detail/vector-borne-diseases)  
647 diseases.
- 648 2. Clark, J.M. (2018). The 3Rs in research: a contemporary approach to replacement, reduction  
649 and refinement. *British Journal of Nutrition* *120*, S1–S7.
- 650 3. Geddes-McAlister, J., and Shapiro, R.S. (2019). New pathogens, new tricks: emerging, drug-  
651 resistant fungal pathogens and future prospects for antifungal therapeutics. *Annals of the*  
652 *New York Academy of Sciences* *1435*, 57–78.
- 653 4. Casadevall, A., Kontoyiannis, D.P., and Robert, V. (2019). On the Emergence of *Candida*  
654 *auris*: Climate Change, Azoles, Swamps, and Birds. *mBio* *10*.
- 655 5. F. Q. Smith, D., and Casadevall, A. (2021). Fungal immunity and pathogenesis in mammals  
656 versus the invertebrate model organism *Galleria mellonella*. *Pathogens and Disease* *79*.
- 657 6. Dubovskiy, I.M., Kryukova, N.A., Glupov, V.V., and Ratcliffe, N.A. (2016). Encapsulation and  
658 nodulation in insects. *Invertebrate Survival Journal* *13*, 229–246.
- 659 7. Clark, K.D. (2020). Insect Hemolymph Immune Complexes. In *Vertebrate and Invertebrate*  
660 *Respiratory Proteins, Lipoproteins and other Body Fluid Proteins Subcellular Biochemistry*,  
661 U. Hoeger and J. R. Harris, eds. (Springer International Publishing), pp. 123–161.
- 662 8. Phillips, D.R., and Clark, K.D. (2017). *Bombyx mori* and *Aedes aegypti* form multi-functional  
663 immune complexes that integrate pattern recognition, melanization, coagulants, and  
664 hemocyte recruitment. *PLOS ONE* *12*, e0171447.
- 665 9. Kim, Y., Ahmed, S., Stanley, D., and An, C. (2018). Eicosanoid-mediated immunity in insects.  
666 *Developmental & Comparative Immunology* *83*, 130–143.
- 667 10. Mandato, C.A., L. Diehl-Jones, W., Moore, S.J., and Downer, R.G.H. (1997). The Effects of  
668 Eicosanoid Biosynthesis Inhibitors On Prophenoloxidase Activation, Phagocytosis and Cell  
669 Spreading in *Galleria mellonella*. *Journal of Insect Physiology* *43*, 1–8.
- 670 11. Shrestha, S., and Kim, Y. (2009). Oenocytoid cell lysis to release prophenoloxidase is  
671 induced by eicosanoid via protein kinase C. *Journal of Asia-Pacific Entomology* *12*, 301–305.
- 672 12. González-Santoyo, I., and Córdoba-Aguilar, A. (2012). Phenoloxidase: a key component of  
673 the insect immune system. *Entomologia Experimentalis et Applicata* *142*, 1–16.
- 674 13. Nappi, A.J., and Christensen, B.M. (2005). Melanogenesis and associated cytotoxic  
675 reactions: Applications to insect innate immunity. *Insect Biochemistry and Molecular*  
676 *Biology* *35*, 443–459.

- 677 14. Barillas-Mury, C. (2007). CLIP proteases and Plasmodium melanization in Anopheles  
678 gambiae. *Trends in Parasitology* 23, 297–299.
- 679 15. Chen, C.C., and Chen, C.S. (1995). *Brugia bahangi*: Effects of Melanization on the Uptake of  
680 Nutrients by Microfilariae in Vitro. *Experimental Parasitology* 81, 72–78.
- 681 16. Zhao, P., Li, J., Wang, Y., and Jiang, H. (2007). Broad-spectrum antimicrobial activity of the  
682 reactive compounds generated in vitro by *Manduca sexta* phenoloxidase. *Insect*  
683 *Biochemistry and Molecular Biology* 37, 952–959.
- 684 17. Zhao, P., Lu, Z., Strand, M.R., and Jiang, H. (2011). Antiviral, anti-parasitic, and cytotoxic  
685 effects of 5,6-dihydroxyindole (DHI), a reactive compound generated by phenoloxidase  
686 during insect immune response. *Insect Biochemistry and Molecular Biology* 41, 645–652.
- 687 18. Zhang, J., Huang, W., Yuan, C., Lu, Y., Yang, B., Wang, C.-Y., Zhang, P., Dobens, L., Zou, Z.,  
688 Wang, C., et al. (2017). Prophenoloxidase-Mediated Ex Vivo Immunity to Delay Fungal  
689 Infection after Insect Ecdysis. *Front. Immunol.* 0.
- 690 19. Mylonakis, E., Moreno, R., Khoury, J.B.E., Idnurm, A., Heitman, J., Calderwood, S.B.,  
691 Ausubel, F.M., and Diener, A. (2005). *Galleria mellonella* as a Model System To Study  
692 *Cryptococcus neoformans* Pathogenesis. *Infection and Immunity* 73, 3842–3850.
- 693 20. Kavanagh, K., and Fallon, J.P. (2010). *Galleria mellonella* larvae as models for studying  
694 fungal virulence. *Fungal Biology Reviews* 24, 79–83.
- 695 21. Ignasiak, K., and Maxwell, A. (2017). *Galleria mellonella* (greater wax moth) larvae as a  
696 model for antibiotic susceptibility testing and acute toxicity trials. *BMC Res Notes* 10, 428.
- 697 22. Firacative, C., Duan, S., and Meyer, W. (2014). *Galleria mellonella* Model Identifies Highly  
698 Virulent Strains among All Major Molecular Types of *Cryptococcus gattii*. *PLOS ONE* 9,  
699 e105076.
- 700 23. Fuchs, B.B., Eby, J., Nobile, C.J., El Khoury, J.B., Mitchell, A.P., and Mylonakis, E. (2010). Role  
701 of filamentation in *Galleria mellonella* killing by *Candida albicans*. *Microbes and Infection*  
702 12, 488–496.
- 703 24. Lu, Z., Deng, J., Wang, H., Zhao, X., Luo, Z., Yu, C., and Zhang, Y. (2021). Multifunctional role  
704 of a fungal pathogen-secreted laccase 2 in evasion of insect immune defense. *Environ*  
705 *Microbiol* 23, 1256–1274.
- 706 25. Fang, W., Fernandes, É.K.K., Roberts, D.W., Bidochka, M.J., and St. Leger, R.J. (2010). A  
707 laccase exclusively expressed by *Metarhizium anisopliae* during isotropic growth is involved  
708 in pigmentation, tolerance to abiotic stresses and virulence. *Fungal Genetics and Biology*  
709 47, 602–607.

- 710 26. Smith, D.F.Q., and Casadevall, A. (2019). The Role of Melanin in Fungal Pathogenesis for  
711 Animal Hosts. In *Fungal Physiology and Immunopathogenesis Current Topics in*  
712 *Microbiology and Immunology.*, M. L. Rodrigues, ed. (Springer International Publishing), pp.  
713 1–30.
- 714 27. Eisenman, H.C., Duong, R., Chan, H., Tsue, R., and McClelland, E.E. (2014). Reduced  
715 virulence of melanized *Cryptococcus neoformans* in *Galleria mellonella*. *Virulence* 5, 611–  
716 618.
- 717 28. Jackson, J.C., Higgins, L.A., and Lin, X. (2009). Conidiation Color Mutants of *Aspergillus*  
718 *fumigatus* Are Highly Pathogenic to the Heterologous Insect Host *Galleria mellonella*. *PLOS*  
719 *ONE* 4, e4224.
- 720 29. Rajendran, R., Borghi, E., Falleni, M., Perdoni, F., Tosi, D., Lappin, D.F., O’Donnell, L.,  
721 Greetham, D., Ramage, G., and Nile, C. (2015). Acetylcholine Protects against *Candida*  
722 *albicans* Infection by Inhibiting Biofilm Formation and Promoting Hemocyte Function in a  
723 *Galleria mellonella* Infection Model. *Eukaryotic Cell* 14, 834–844.
- 724 30. Smith, D.F.Q., Camacho, E., Thakur, R., Barron, A.J., Dong, Y., Dimopoulos, G., Broderick,  
725 N.A., and Casadevall, A. (2021). Glyphosate inhibits melanization and increases  
726 susceptibility to infection in insects. *PLOS Biology* 19, e3001182.
- 727 31. Liu, Y., Huang, X., Liu, H., Xi, L., and Cooper, C.R. (2019). Increased virulence of albino  
728 mutant of *Fonsecaea monophora* in *Galleria mellonella*. *Medical Mycology* 57, 1018–1023.
- 729 32. Moya-Andérico, L., Admella, J., and Torrents, E. (2021). A clearing protocol for *Galleria*  
730 *mellonella* larvae: Visualization of internalized fluorescent nanoparticles. *N Biotechnol* 60,  
731 20–26.
- 732 33. Trevijano-Contador, N., Herrero-Fernández, I., García-Barbazán, I., Scorzoni, L., Rueda, C.,  
733 Rossi, S.A., García-Rodas, R., and Zaragoza, O. (2015). *Cryptococcus neoformans* induces  
734 antimicrobial responses and behaves as a facultative intracellular pathogen in the non  
735 mammalian model *Galleria mellonella*. *Virulence* 6, 66–74.
- 736 34. Mitchell, A.P. (1998). Dimorphism and virulence in *Candida albicans*. *Current Opinion in*  
737 *Microbiology* 1, 687–692.
- 738 35. Martin, R., Albrecht-Eckardt, D., Brunke, S., Hube, B., Hünninger, K., and Kurzai, O. (2013). A  
739 Core Filamentation Response Network in *Candida albicans* Is Restricted to Eight Genes.  
740 *PLOS ONE* 8, e58613.
- 741 36. Borghi, E., Romagnoli, S., Fuchs, B.B., Cirasola, D., Perdoni, F., Tosi, D., Braidotti, P.,  
742 Bulfamante, G., Morace, G., and Mylonakis, E. (2014). Correlation between *Candida*  
743 *albicans* biofilm formation and invasion of the invertebrate host *Galleria mellonella*. *Future*  
744 *Microbiology* 9, 163–173.

- 745 37. Marcos-Zambrano, L.J., Bordallo-Cardona, M.Á., Borghi, E., Falleni, M., Tosi, D., Muñoz, P.,  
746 Escribano, P., and Guinea, J. (2020). *Candida* isolates causing candidemia show different  
747 degrees of virulence in *Galleria mellonella*. *Med Mycol* 58, 83–92.
- 748 38. Sheehan, G., and Kavanagh, K. (2019). Proteomic Analysis of the Responses of *Candida*  
749 *albicans* during Infection of *Galleria mellonella* Larvae. *Journal of Fungi* 5, 7.
- 750 39. Perdoni, F., Falleni, M., Tosi, D., Cirasola, D., Romagnoli, S., Braidotti, P., Clementi, E.,  
751 Bulfamante, G., and Borghi, E. (2014). A Histological Procedure to Study Fungal Infection in  
752 the Wax Moth *Galleria Mellonella*. *Eur J Histochem* 58.
- 753 40. Nappi, A.J. (1973). The role of melanization in the immune reaction of larvae of *Drosophila*  
754 *algonquin* against *Pseudeucoila bochei*. *Parasitology* 66, 23–32.
- 755 41. Ezzati-Tabizi, R., Talaei-Hassanloui, R., Farrokhi, N., Hossininaveh, V., and Alavi, M. (2013).  
756 Haemolymph phenoloxidase activity of larval *Plodia interpunctella* and *Galleria mellonella*  
757 in response to *Beauveria bassiana* and *Pseudomonas fluorescens*. *International Journal of*  
758 *Agriculture Innovations and Research* 2, 217–220.
- 759 42. Toffaletti, D.L., and Perfect, J.R. (1997). Study of *Cryptococcus neoformans* actin gene  
760 regulation with a beta-galactosidase-actin fusion. *J Med Vet Mycol* 35, 313–320.
- 761 43. Poeta, M. del, Toffaletti, D.L., Rude, T.H., Sparks, S.D., Heitman, J., and Perfect, J.R. (1999).  
762 *Cryptococcus neoformans* Differential Gene Expression Detected In Vitro and In Vivo with  
763 Green Fluorescent Protein. *Infection and Immunity*.
- 764 44. Vertyporokh, L., and Wojda, I. (2020). Immune response of *Galleria mellonella* after  
765 injection with non-lethal and lethal dosages of *Candida albicans*. *Journal of Invertebrate*  
766 *Pathology* 170, 107327.
- 767 45. Voelz, K., Johnston, S.A., Rutherford, J.C., and May, R.C. (2010). Automated Analysis of  
768 Cryptococcal Macrophage Parasitism Using GFP-Tagged Cryptococci. *PLOS ONE* 5, e15968.
- 769 46. Stoepler, T.M., Castillo, J.C., Lill, J.T., and Eleftherianos, I. (2012). A Simple Protocol for  
770 Extracting Hemocytes from Wild Caterpillars. *J Vis Exp*, 4173.
- 771 47. Mandato, C.A., Diehl-Jones, W.L., and Downer, R.G.H. (1996). Insect hemocyte adhesion in  
772 vitro: Inhibition by apoliphorin I and an artificial substrate. *Journal of Insect Physiology* 42,  
773 143–148.
- 774 48. WAGO, H. (1988). The role of phenoloxidase in the cellular defence reactions to foreign  
775 materials by the granular cells of the silkworm, *Bombyx mori*. *Invertebrate and Fish Tissue*  
776 *Culture*, 185–188.

- 777 49. Tojo, S., Naganuma, F., Arakawa, K., and Yokoo, S. (2000). Involvement of both granular  
778 cells and plasmatocytes in phagocytic reactions in the greater wax moth, *Galleria*  
779 *mellonella*. *Journal of Insect Physiology* 46, 1129–1135.
- 780 50. Schindelin, J., Arganda-Carreras, I., Frise, E., Kaynig, V., Longair, M., Pietzsch, T., Preibisch,  
781 S., Rueden, C., Saalfeld, S., Schmid, B., et al. (2012). Fiji: an open-source platform for  
782 biological-image analysis. *Nature Methods* 9, 676–682.
- 783 51. Collins, J.T., Knapper, J., Stirling, J., Mduda, J., Mkindi, C., Mayagaya, V., Mwakajinga, G.A.,  
784 Nyakyi, P.T., Sanga, V.L., Carbery, D., et al. (2019). Robotic microscopy for everyone: the  
785 OpenFlexure Microscope. 861856.
- 786
- 787



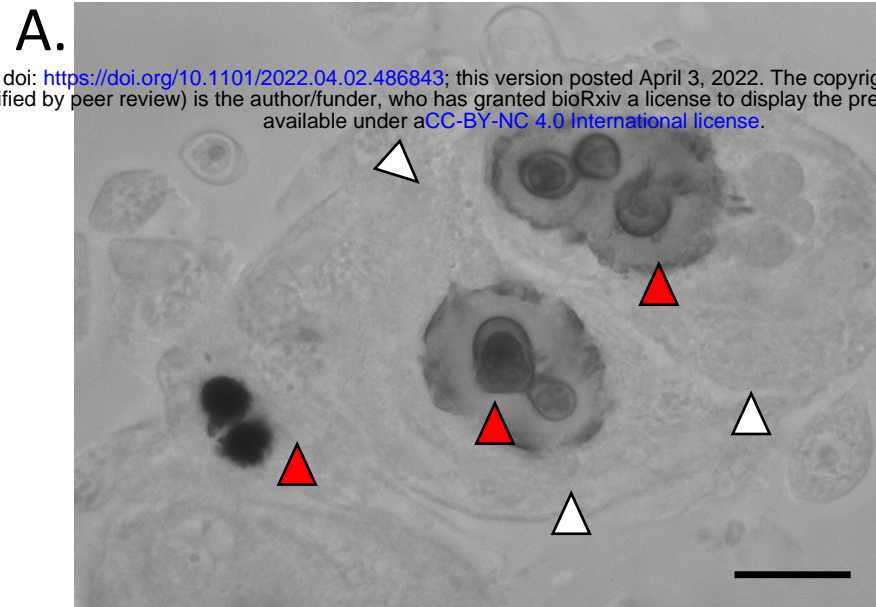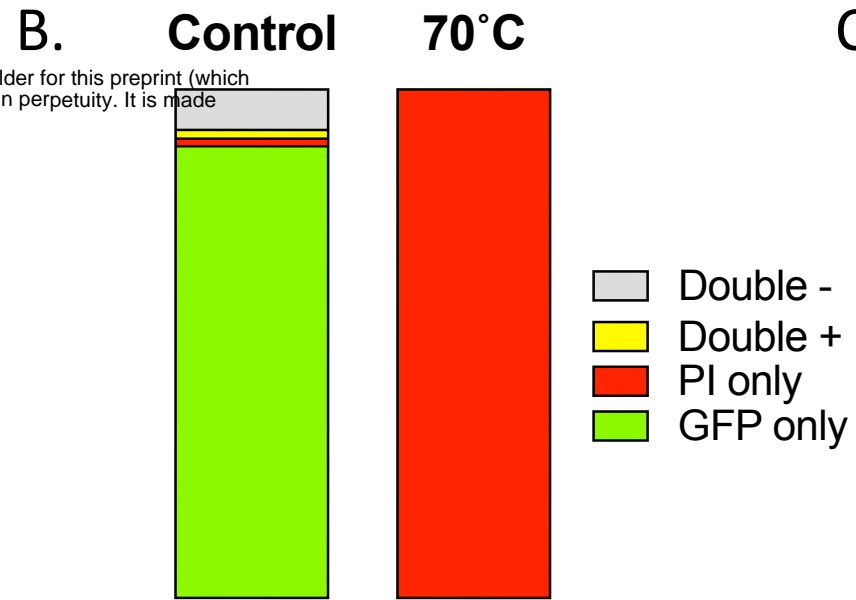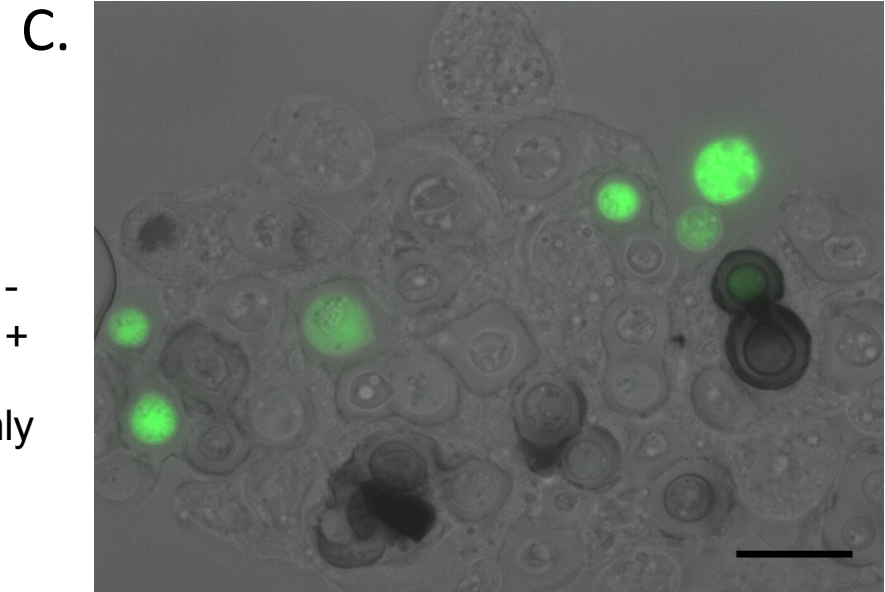

**D.**

|              | Room Temperature 24 h |               | Room Temperature 72 h |               | 30°C 24 h |               | 30°C 72 h |               |
|--------------|-----------------------|---------------|-----------------------|---------------|-----------|---------------|-----------|---------------|
|              | Melanized             | Non-Melanized | Melanized             | Non-Melanized | Melanized | Non-Melanized | Melanized | Non-Melanized |
| GFP Positive | 2                     | 2             | 11                    | 35            | 54        | 44            | 17        | 38            |
| GFP Negative | 27                    | 7             | 99                    | 72            | 196       | 31            | 87        | 61            |

p > 0.05 (Room Temp 24h), p = 0.00004 (Room Temp 72h), p < 0.00001 (30°C 24h), p = 0.0001 (30°C 72h)

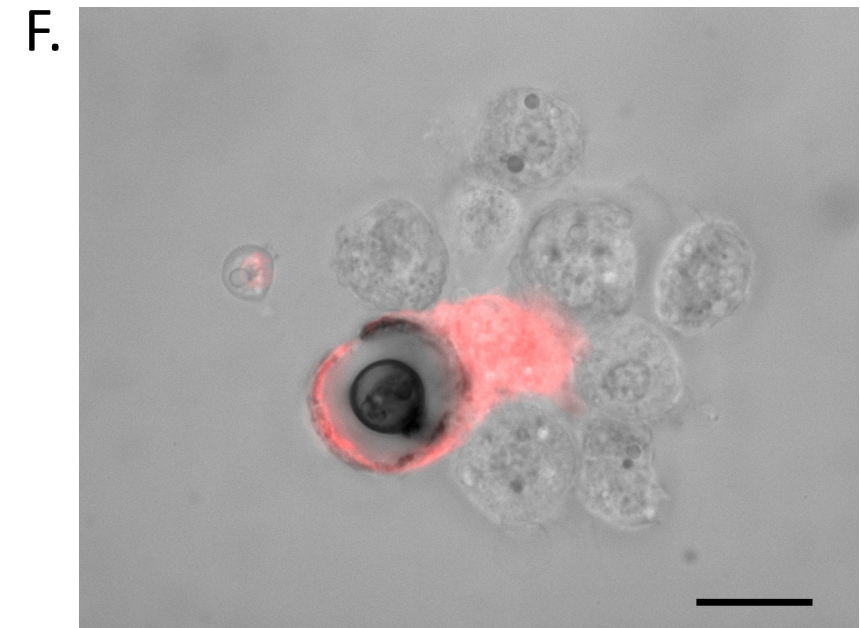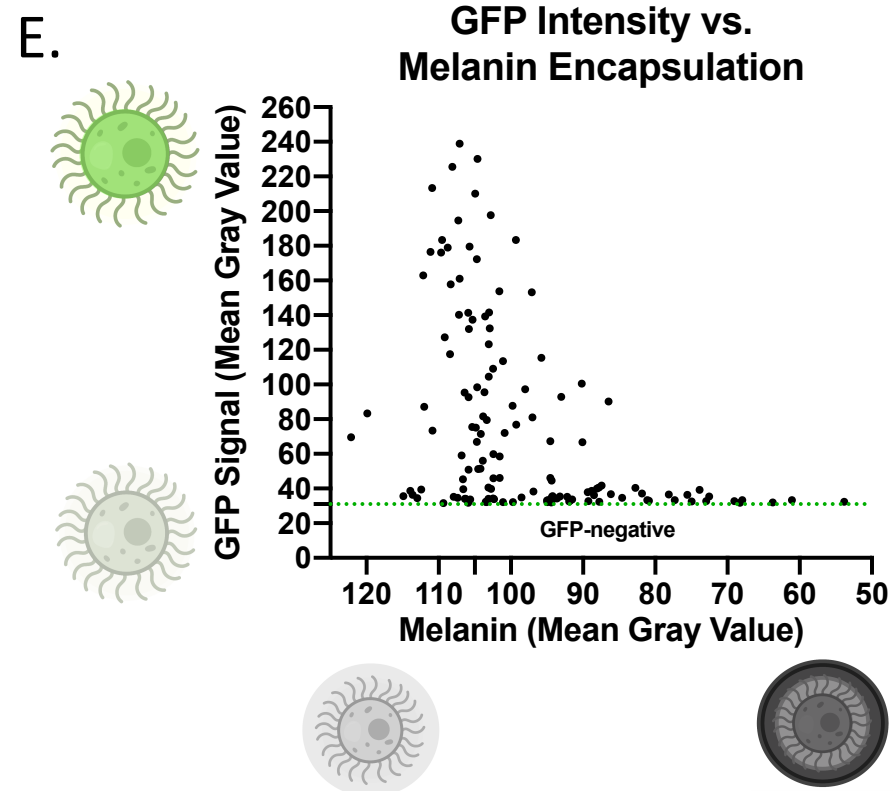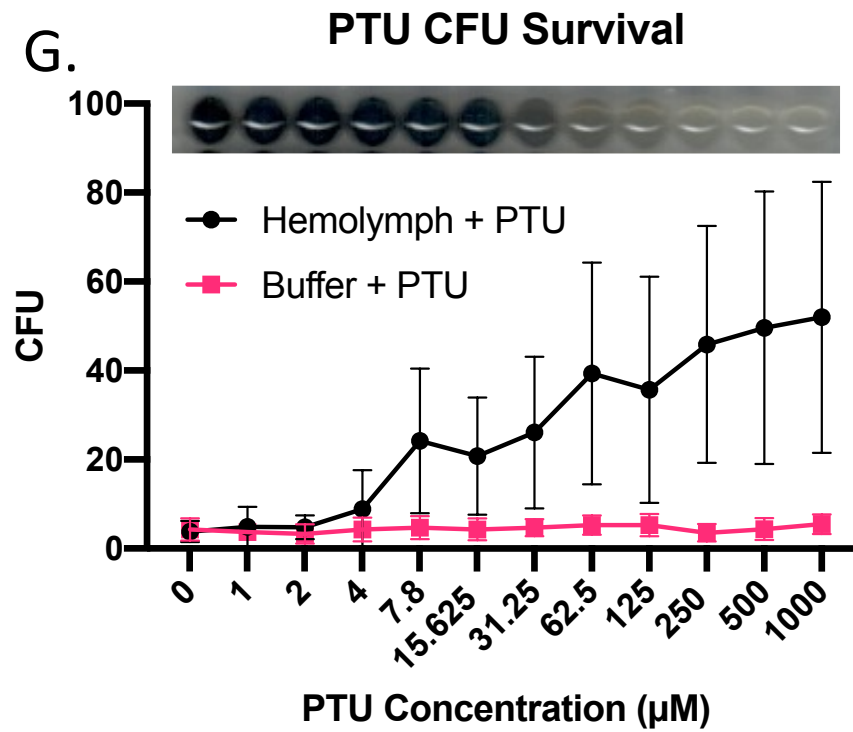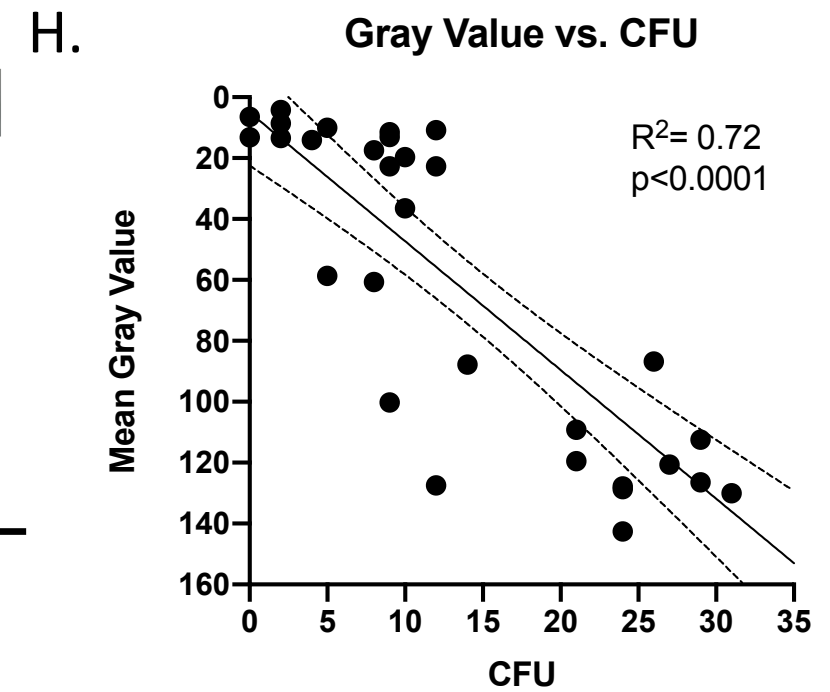

**A.**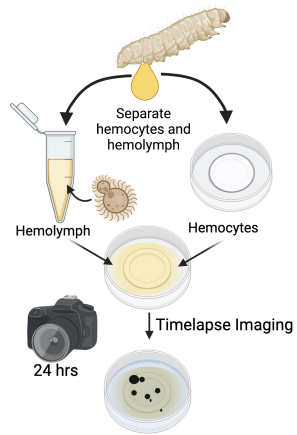**B.**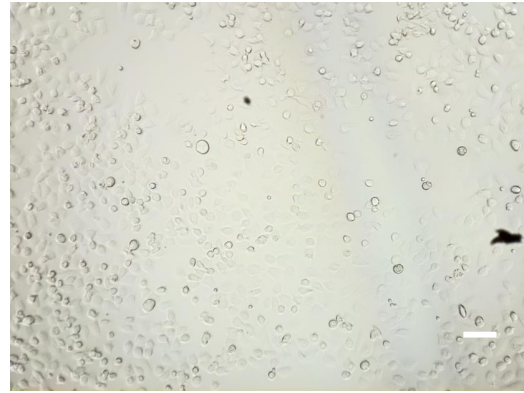**C.**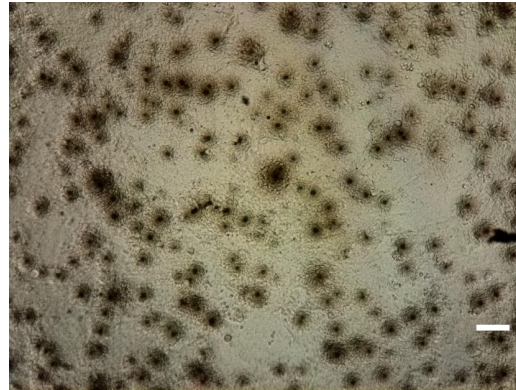**D.**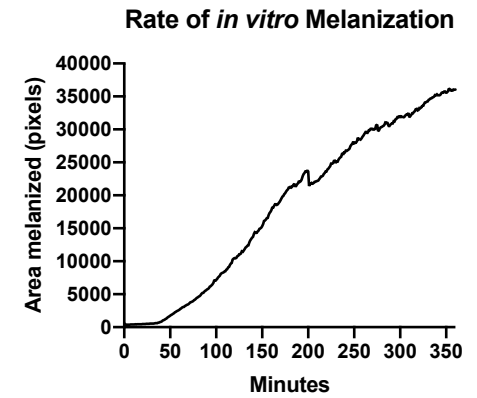**E.**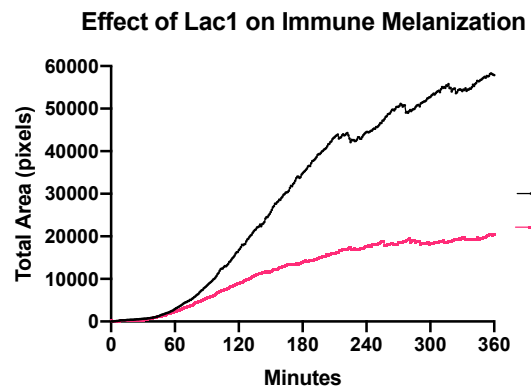**F.** *lac1Δ*:H99 Hemolymph Melanization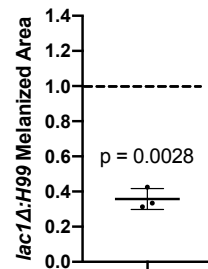**G.** Melanization in Response to Fungal Melanin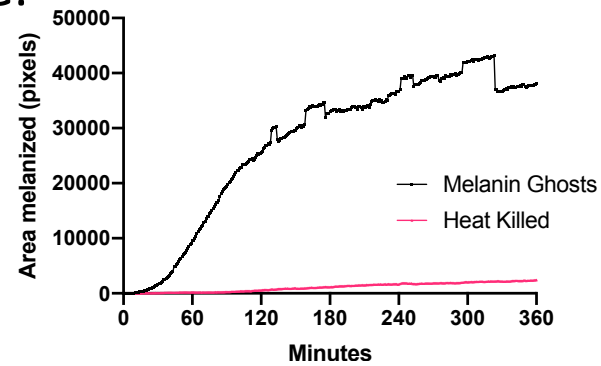**H.** *C. neoformans* vs. *C. albicans*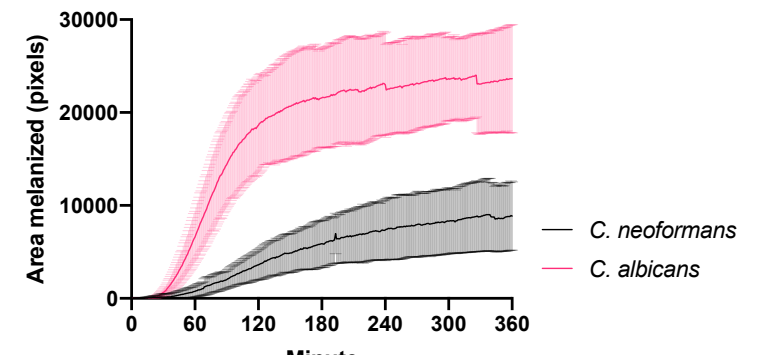



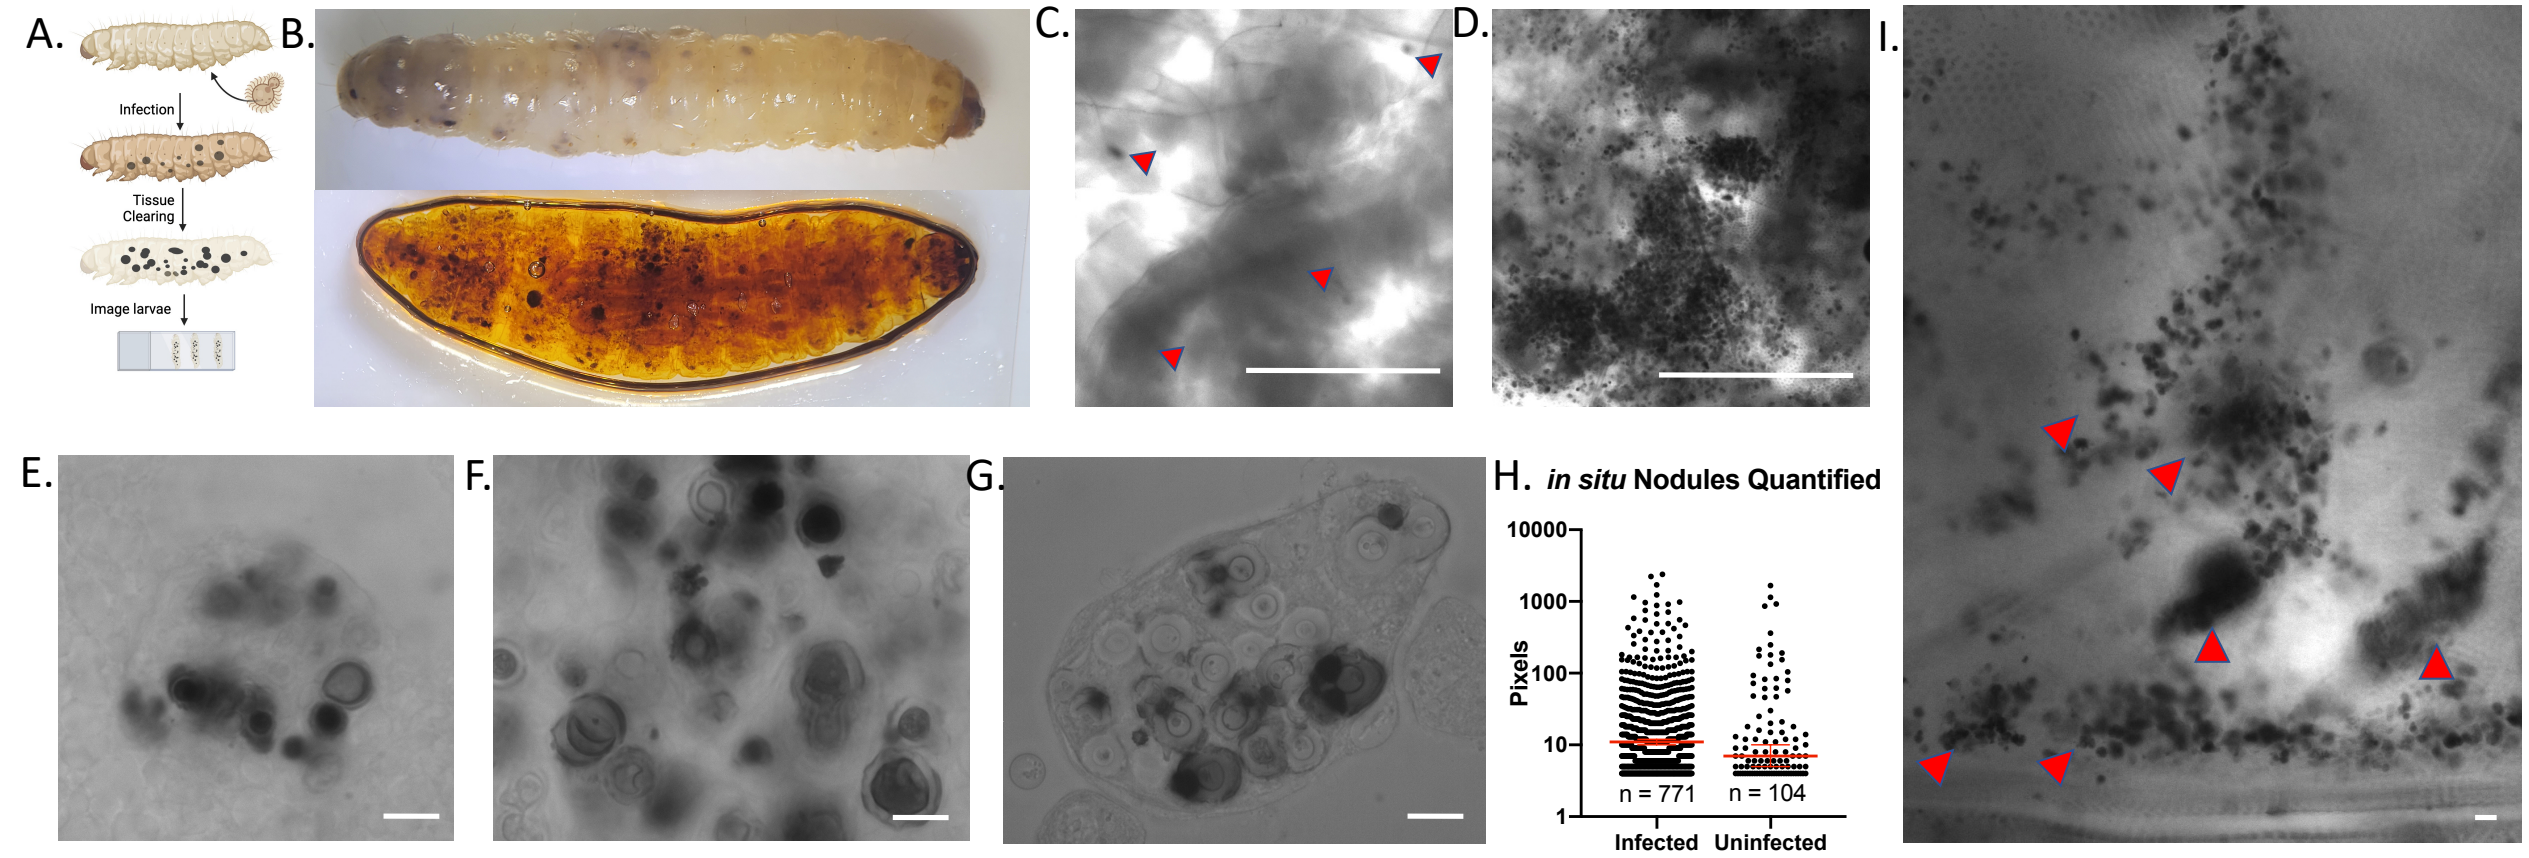



A.

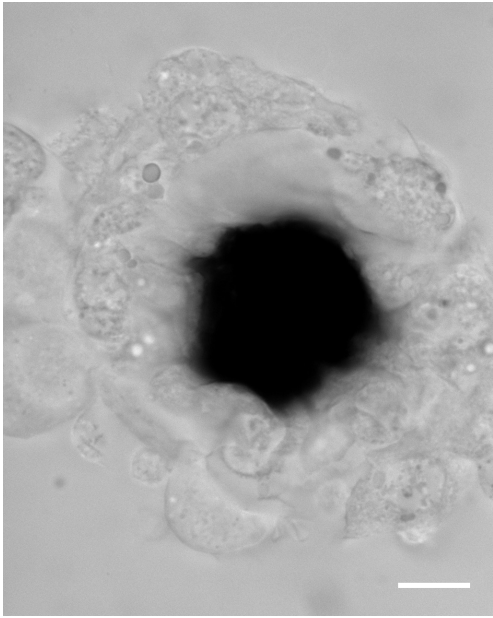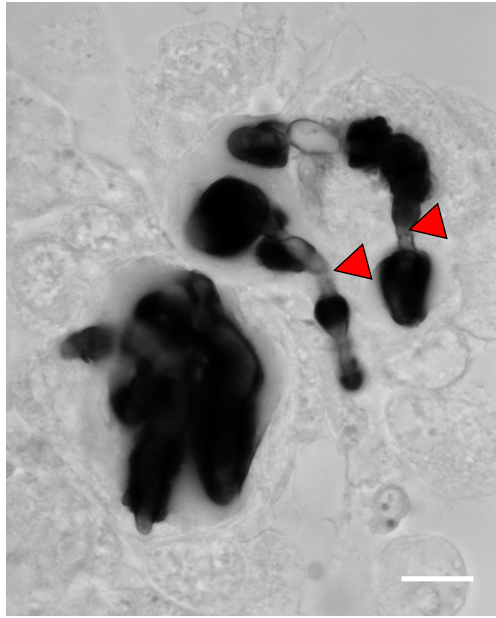

B.

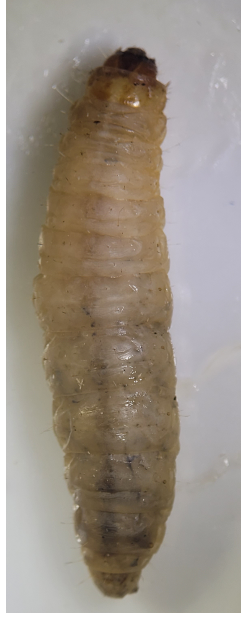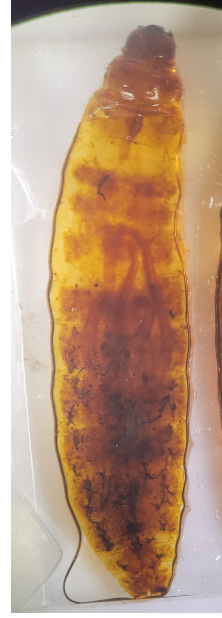

C.

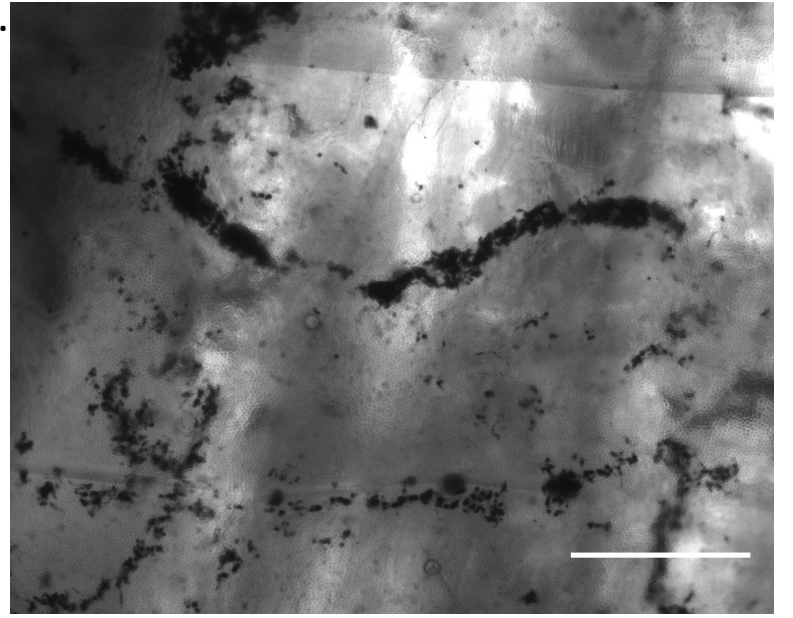

D.

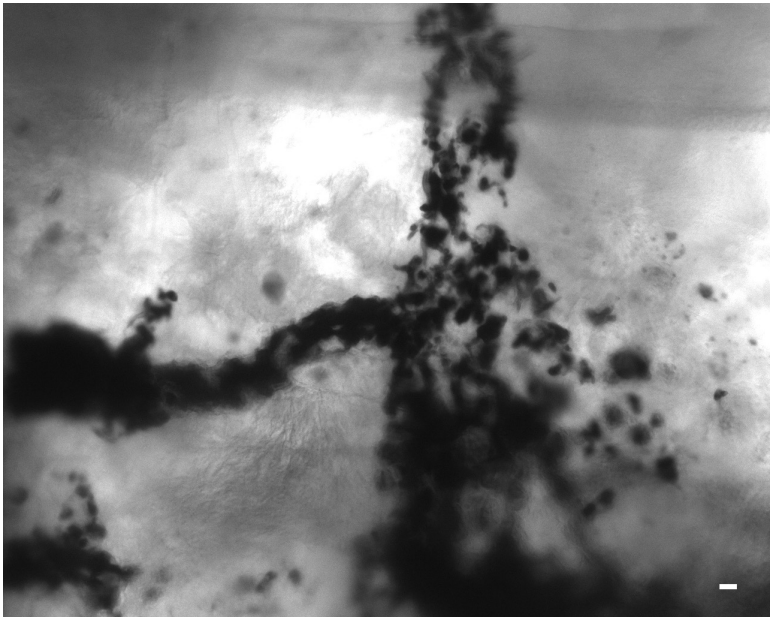

E.

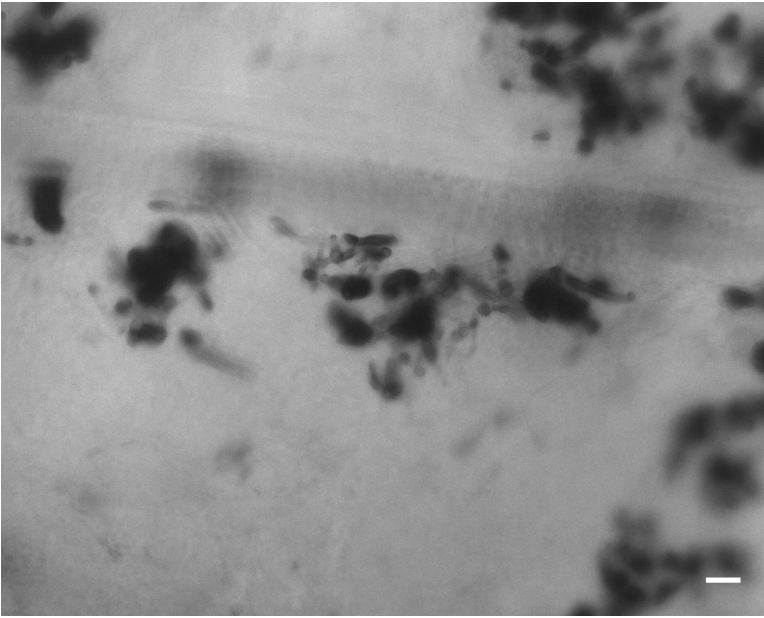

F.

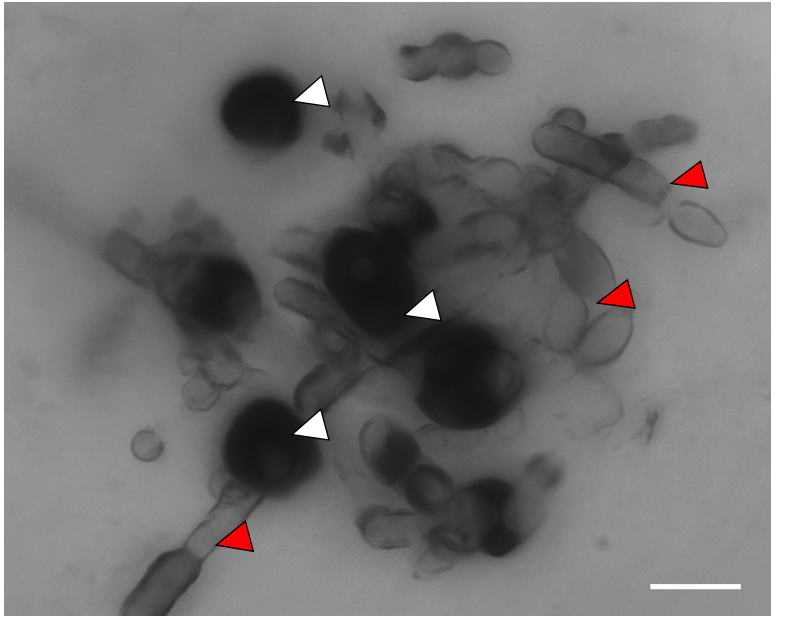



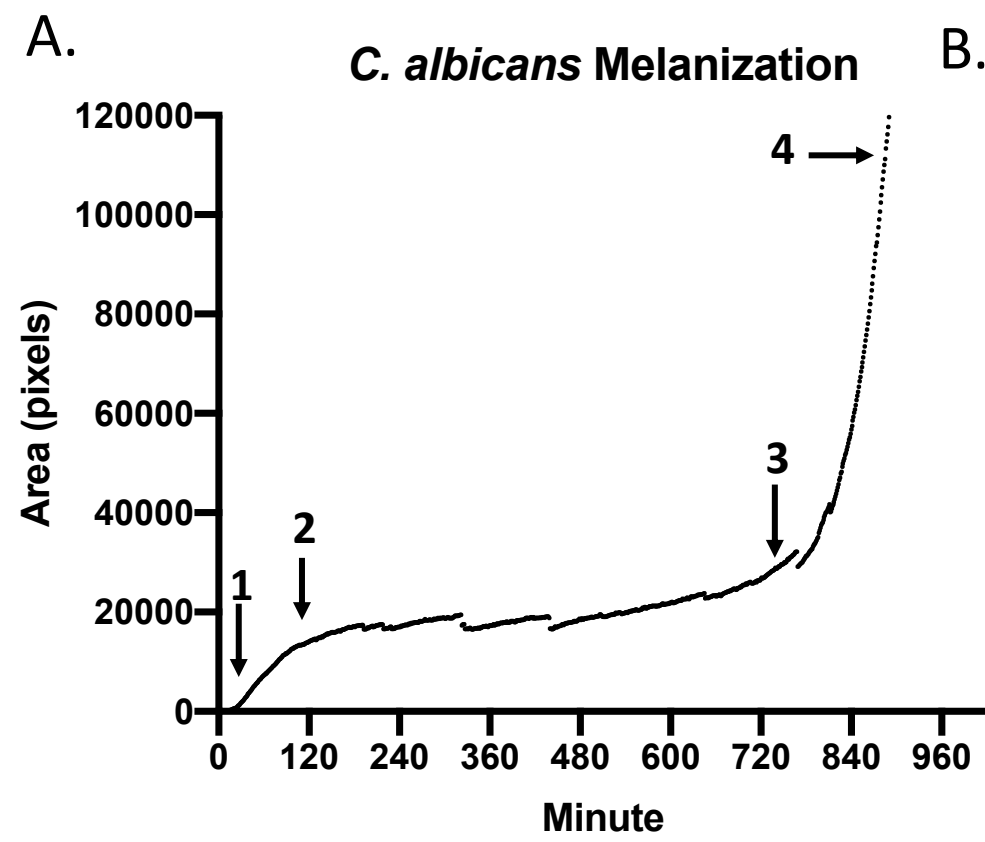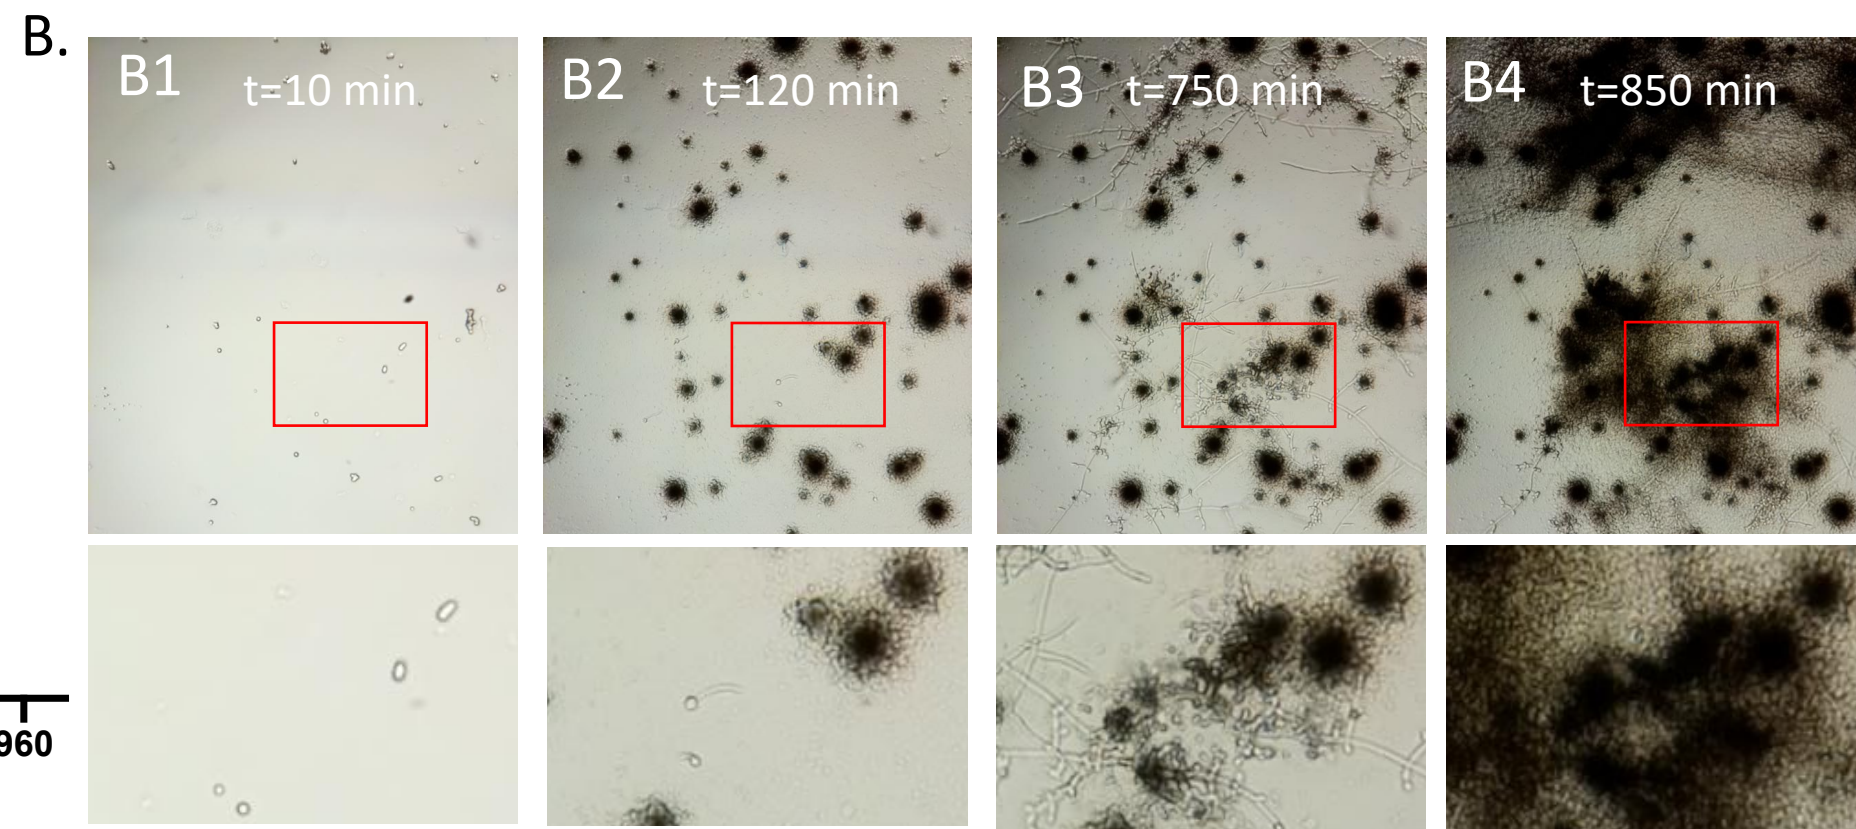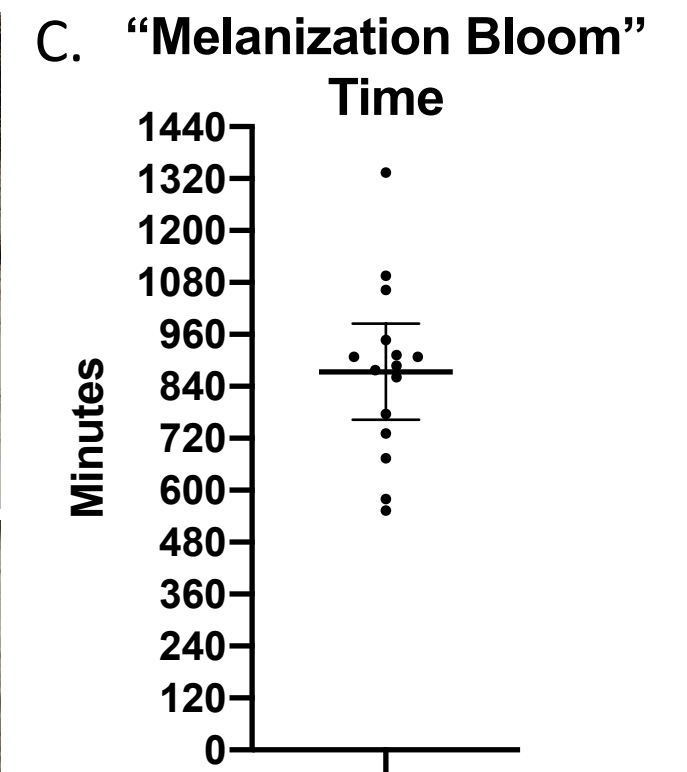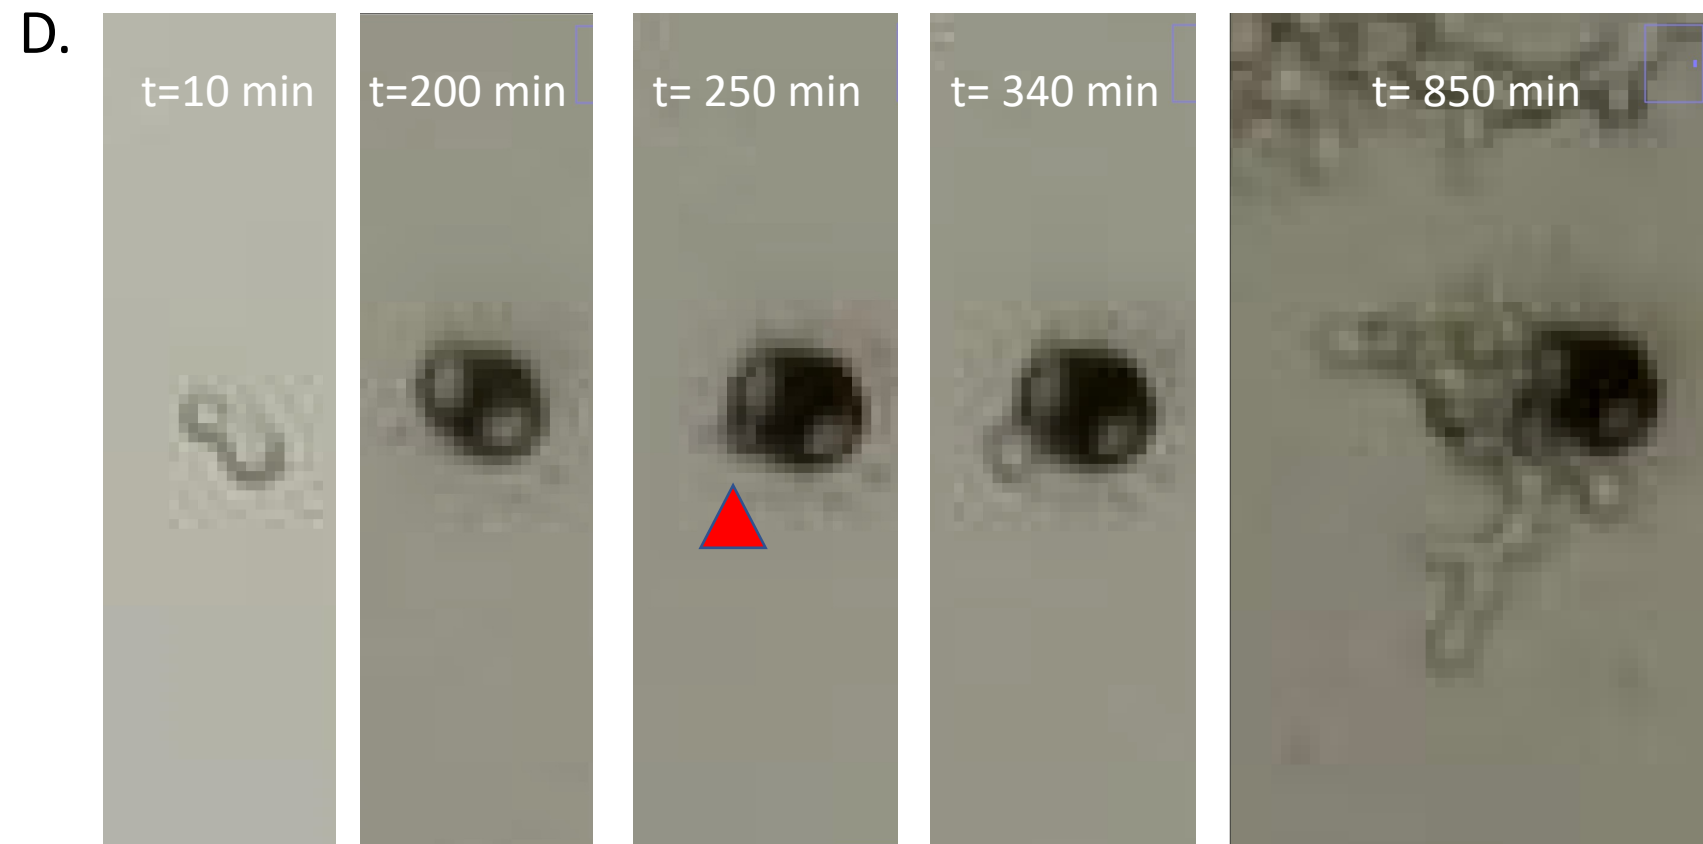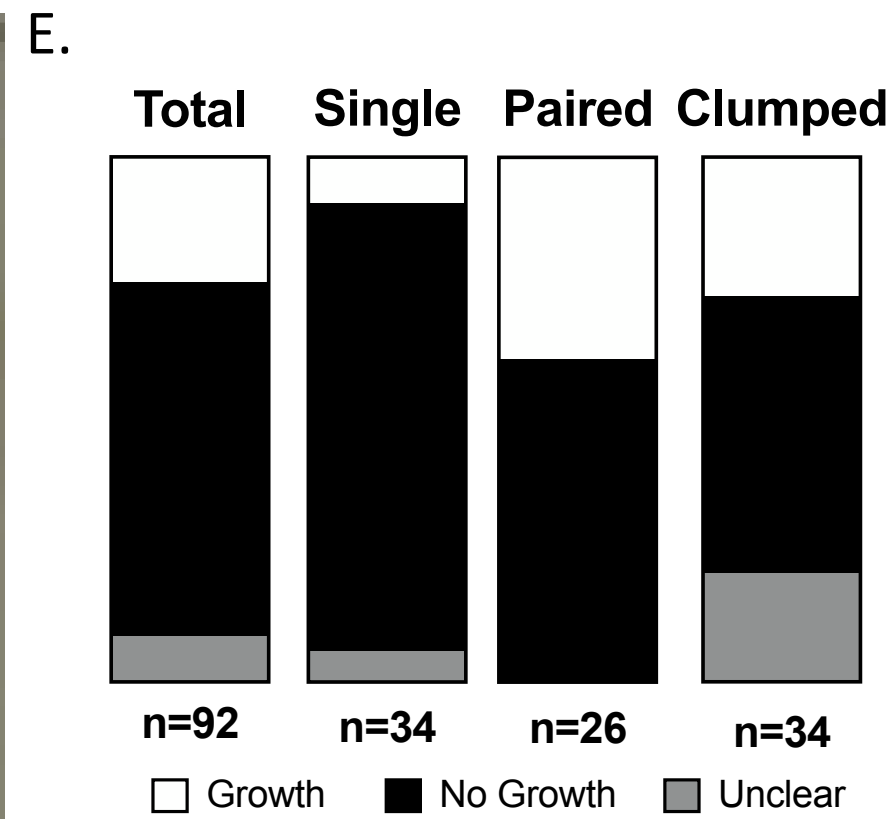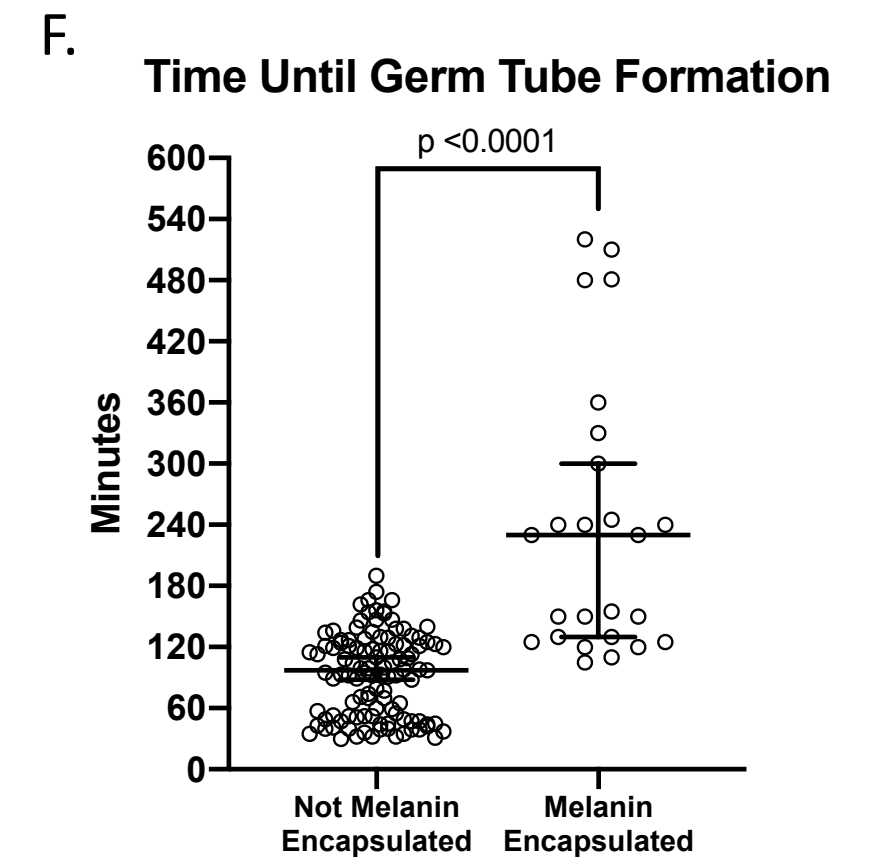

1

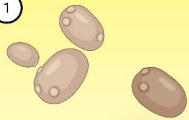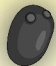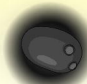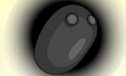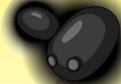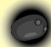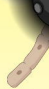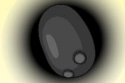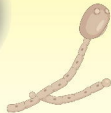

2

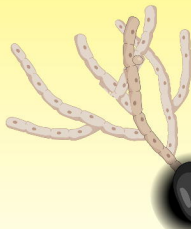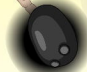

3

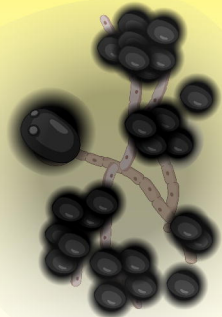

Within 15 minutes of exposure to hemolymph, immune melanin forms around the *C. albicans* yeast.

Following melanin encapsulation, ~25% of yeast form a germ tube that grows and escapes the melanin encapsulation. Non-melanin encapsulated yeast form germ tubes faster and more frequently

Hyphal growth continues, with minimal melanization occurring on hyphae

Yeast (Blastoconidium) begin to form on hyphae after ~12-16 hours, which triggers a large scale melanization response

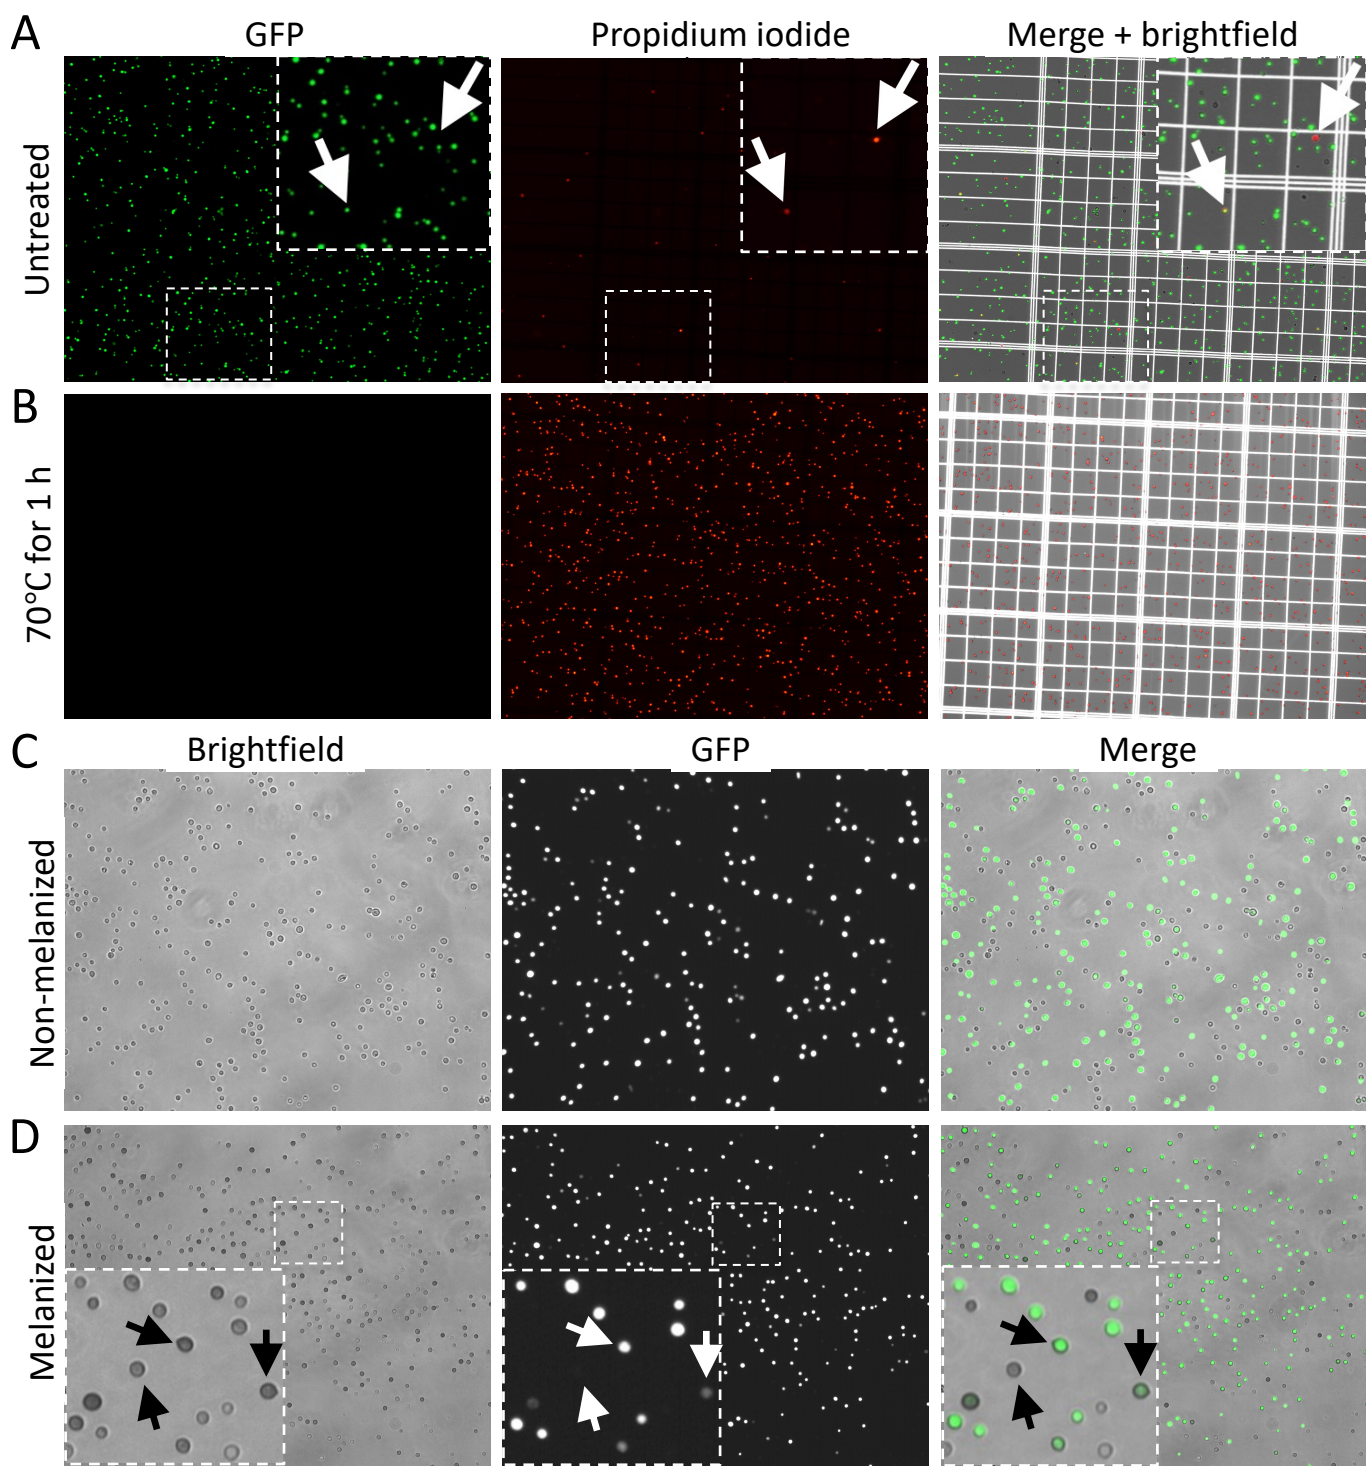



A.

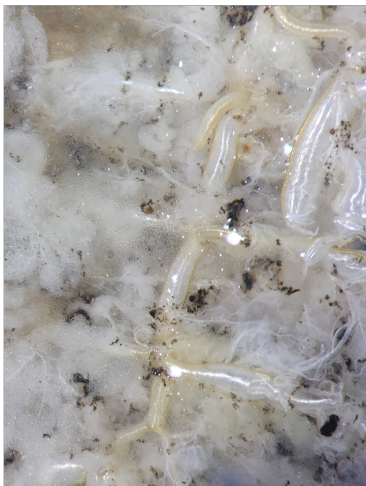

C.

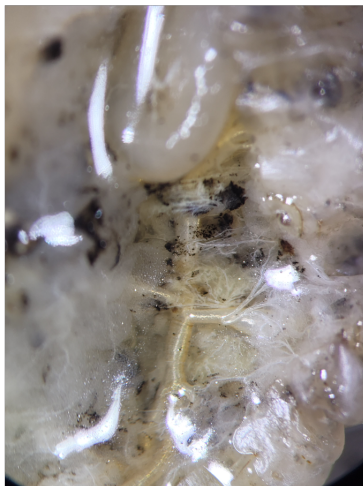

E.

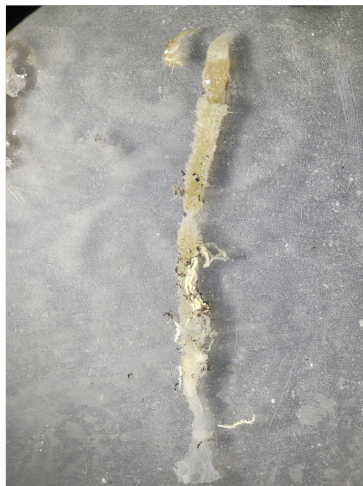

B.

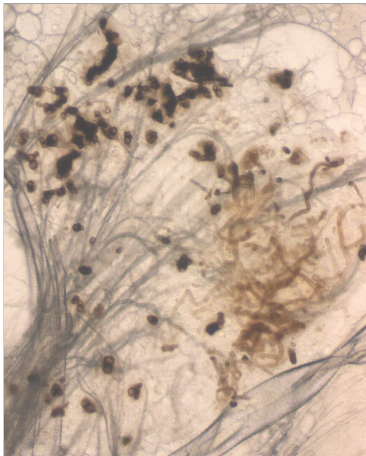

D.

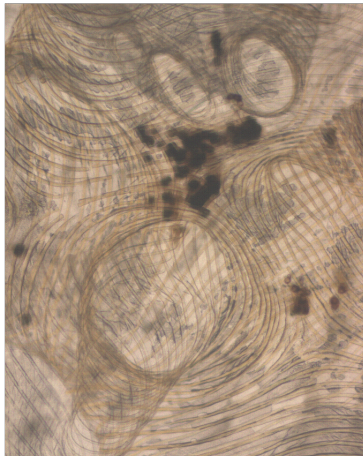

F.

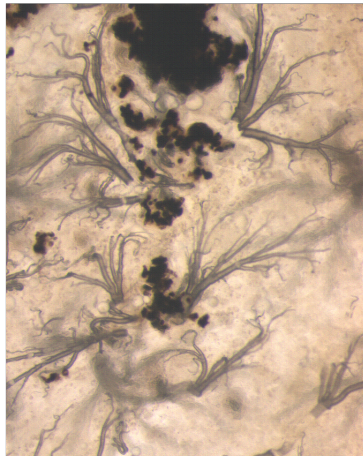

G.

t = 0

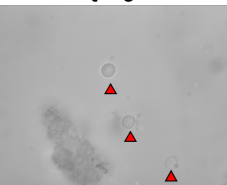

t = 1h

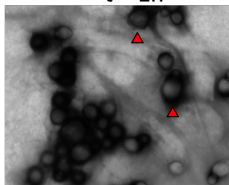

t = 12h

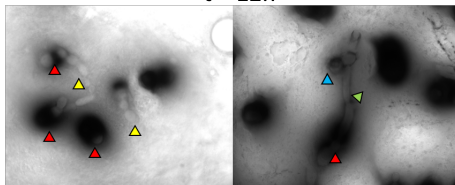

t = 17h

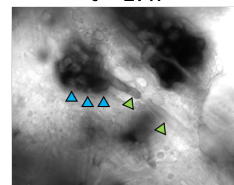

**Surface Sterilized  
*G. mellonella***

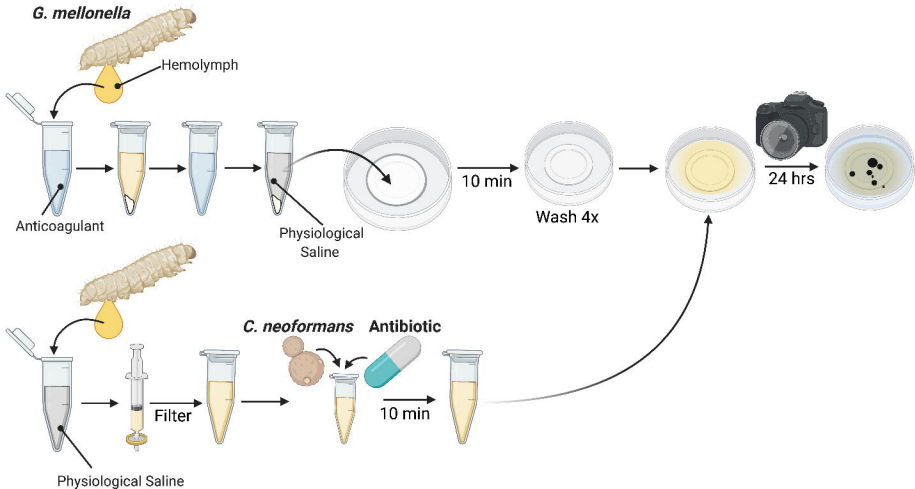

Source: https://www.biorxiv.org/content/10.1101/2022.04.02.486843v1.full.pdf
